# Supplementary material for: α,α-Difluorophosphonohydroxamic Acid Derivatives among the Best Antibacterial Fosmidomycin Analogues
Source: MDPI journal article supplement (doi:10.3390/molecules26165111), 2021-08-23

## **$\alpha,\alpha$ -Difluorophosphonohydroxamic acid derivatives among the best antibacterial fosmidomycin analogues**

Aurore Dreneau, Fanny S. Krebs, Mathilde Munier, Chheng Ngov, Denis Tritsch, Didier Lièvremon, Michel Rohmer and Catherine Grosdemange-Billiard\*

Laboratoire de Chimie et Biochimie de Molécules Bioactives – Université de Strasbourg/CNRS, UMR 7177, Institut Le Bel, 4 rue Blaise Pascal, 67081 Strasbourg, France

$^1\text{H}$ ,  $^{13}\text{C}$ ,  $^{31}\text{P}$ ,  $^{19}\text{F}$  NMR spectra

|                     |    |
|---------------------|----|
| Compound <b>12</b>  | 2  |
| Compound <b>13</b>  | 4  |
| Compound <b>14</b>  | 5  |
| Compound <b>15a</b> | 7  |
| Compound <b>15b</b> | 9  |
| Compound <b>16a</b> | 11 |
| Compound <b>16b</b> | 13 |
| Compound <b>17</b>  | 15 |
| Compound <b>18</b>  | 17 |
| Compound <b>19a</b> | 19 |
| Compound <b>19b</b> | 21 |
| Compound <b>20a</b> | 23 |
| Compound <b>20b</b> | 25 |
| Compound <b>9b</b>  | 27 |
| Compound <b>10a</b> | 29 |
| Compound <b>10b</b> | 31 |

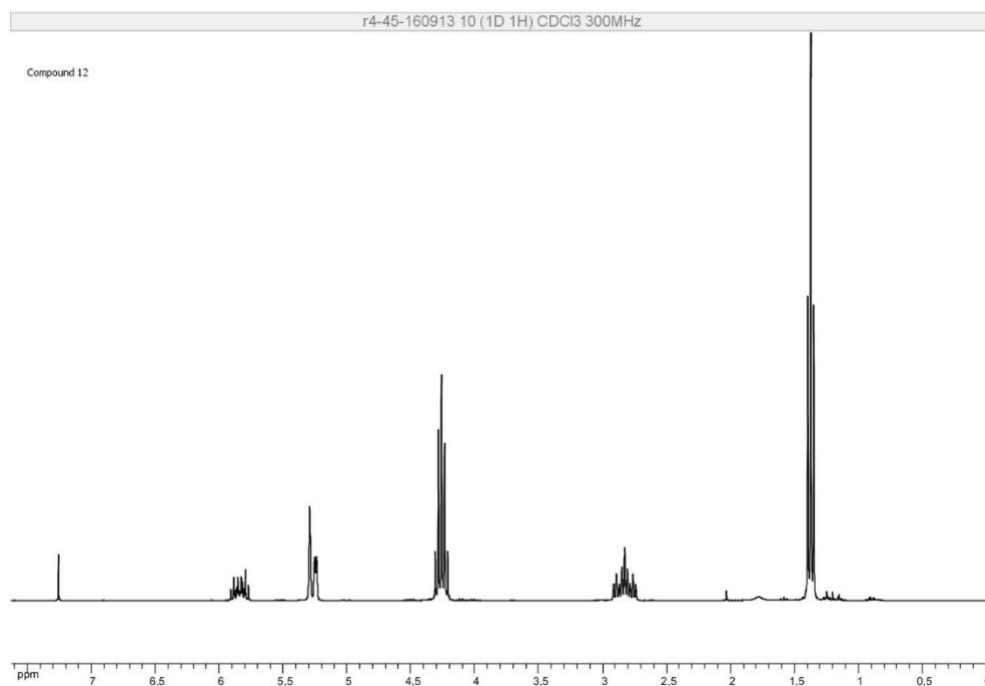

Compound **19b**

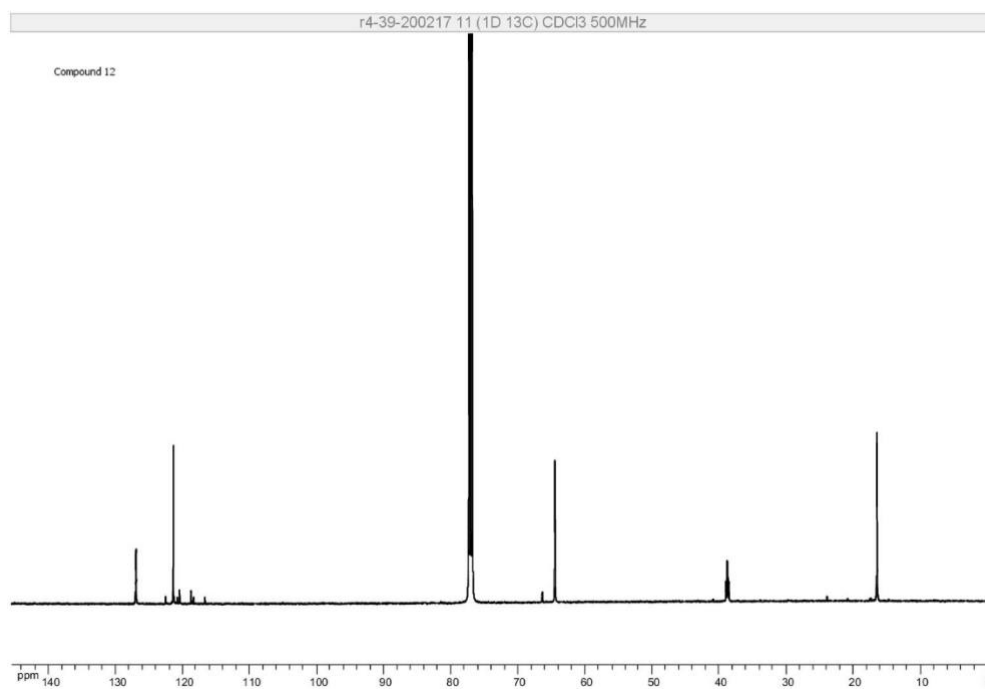

r4-39-200217-31P 10 (1D 31P) CDCl3 300MHz

Compound 12

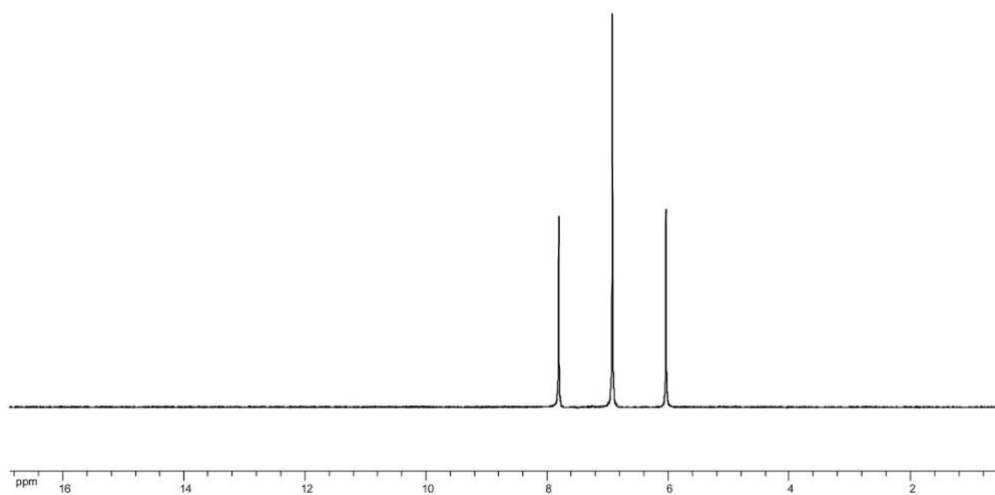

r4-39-200217-19F 10 (1D 19F) CDCl3 300MHz

Compound 12

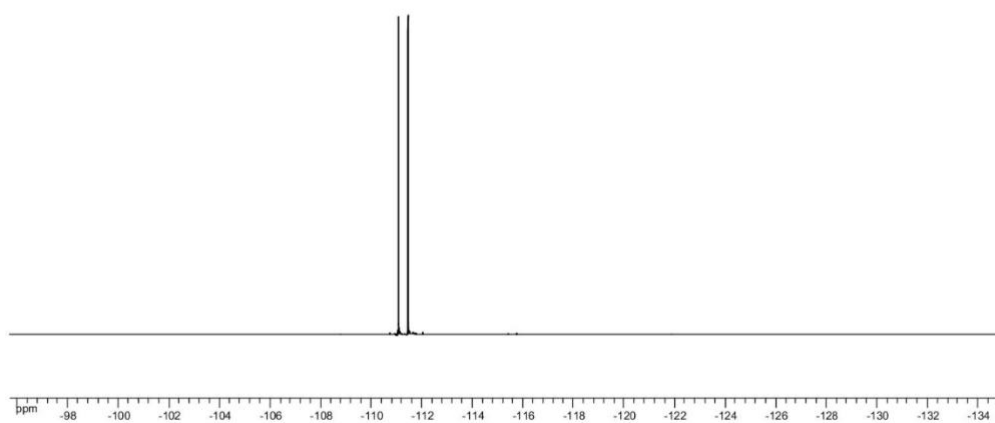

Compound **13**

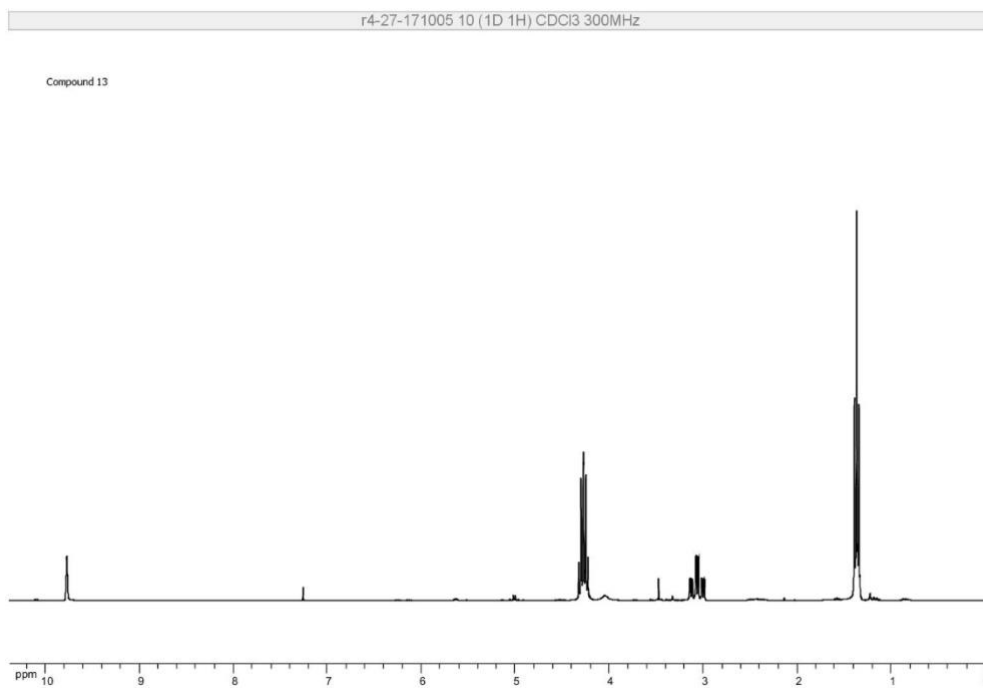

Compound **14**

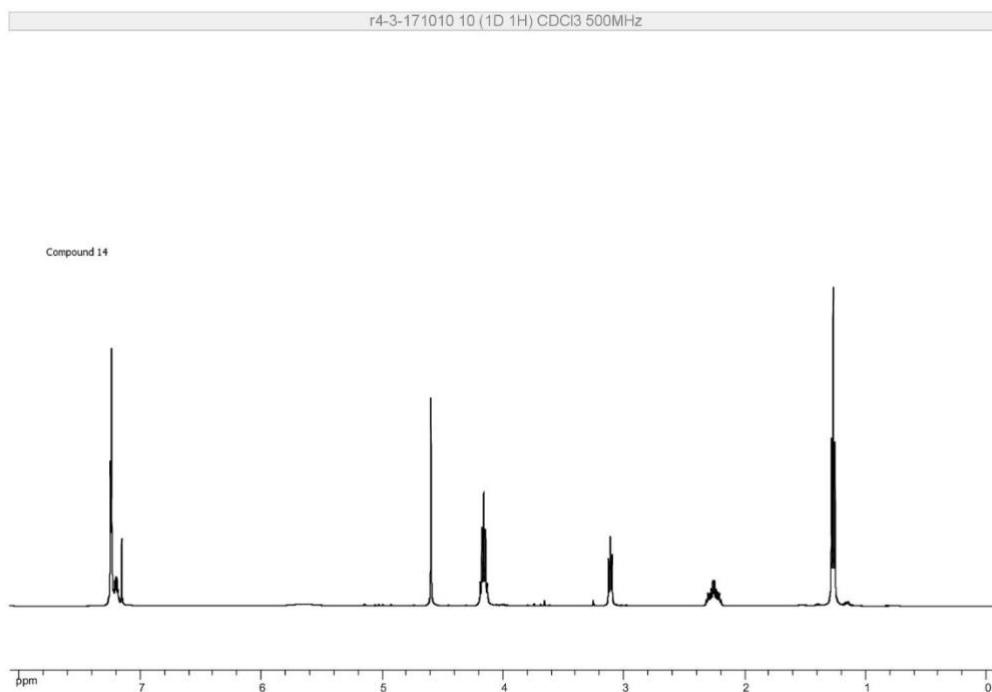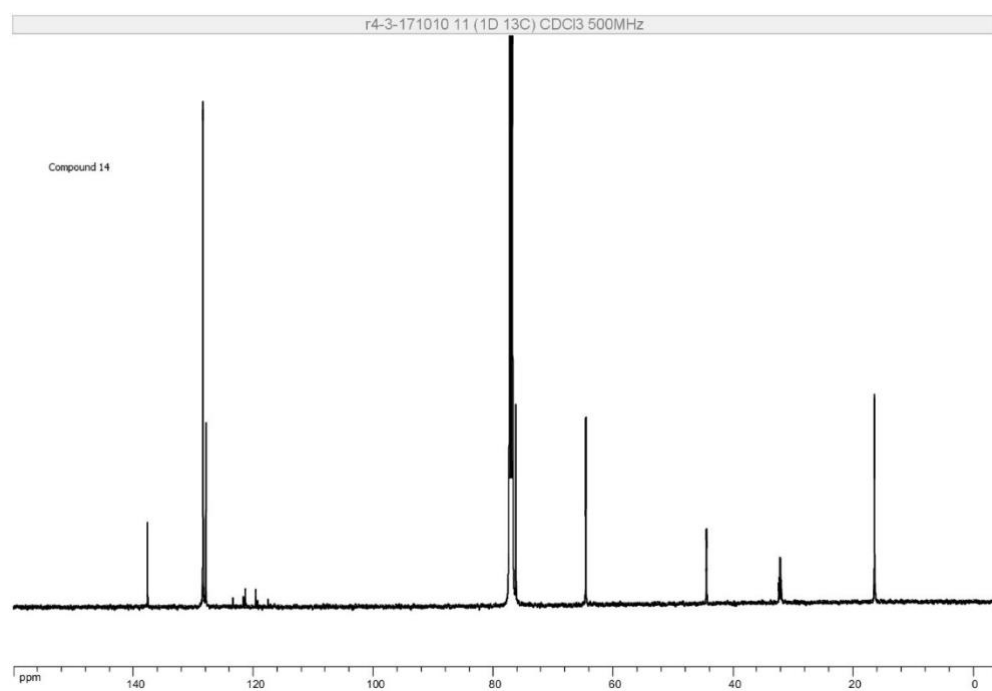

Compound 14

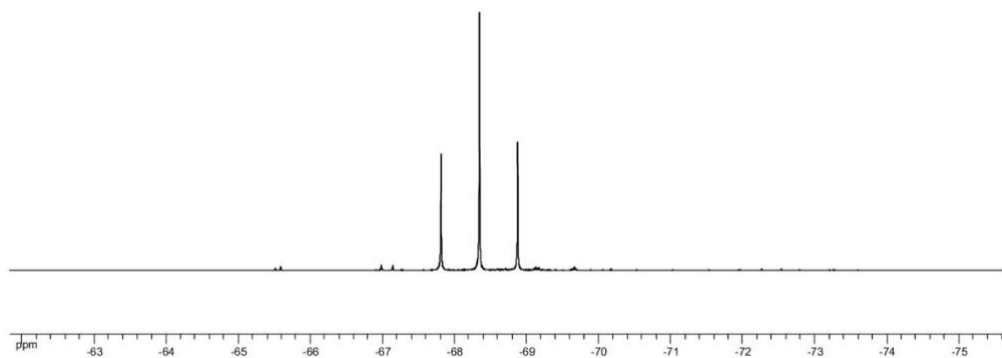

Compound 14

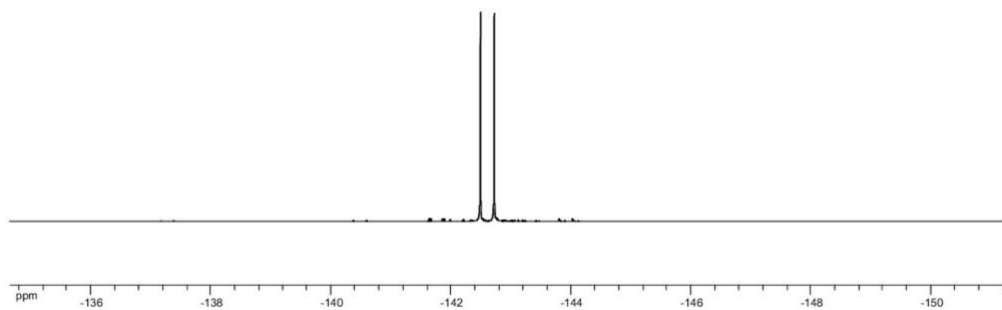

Compound **15a**

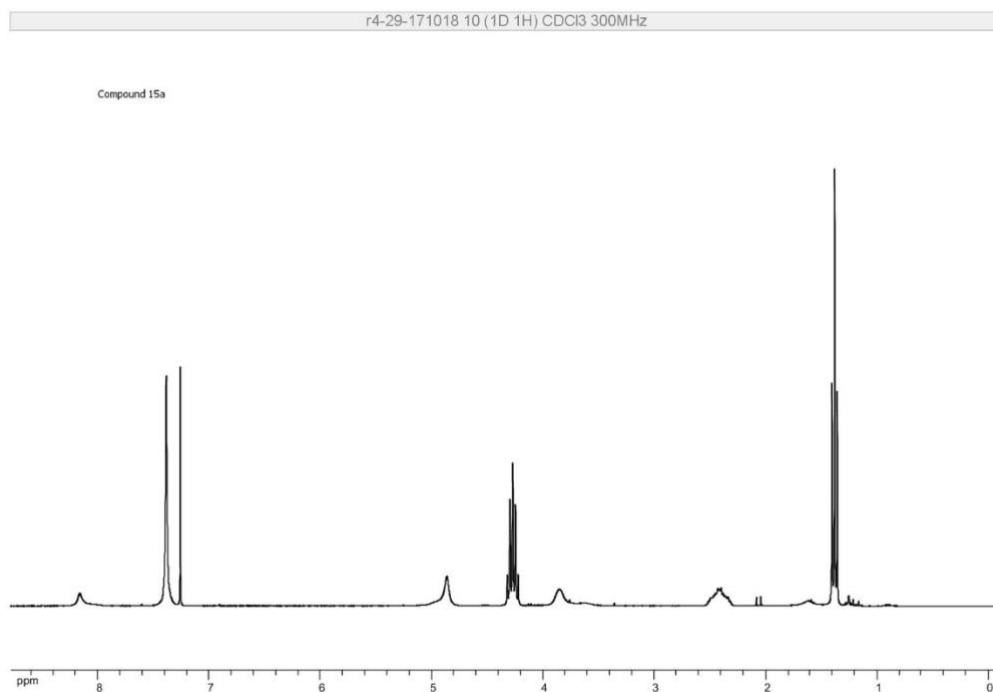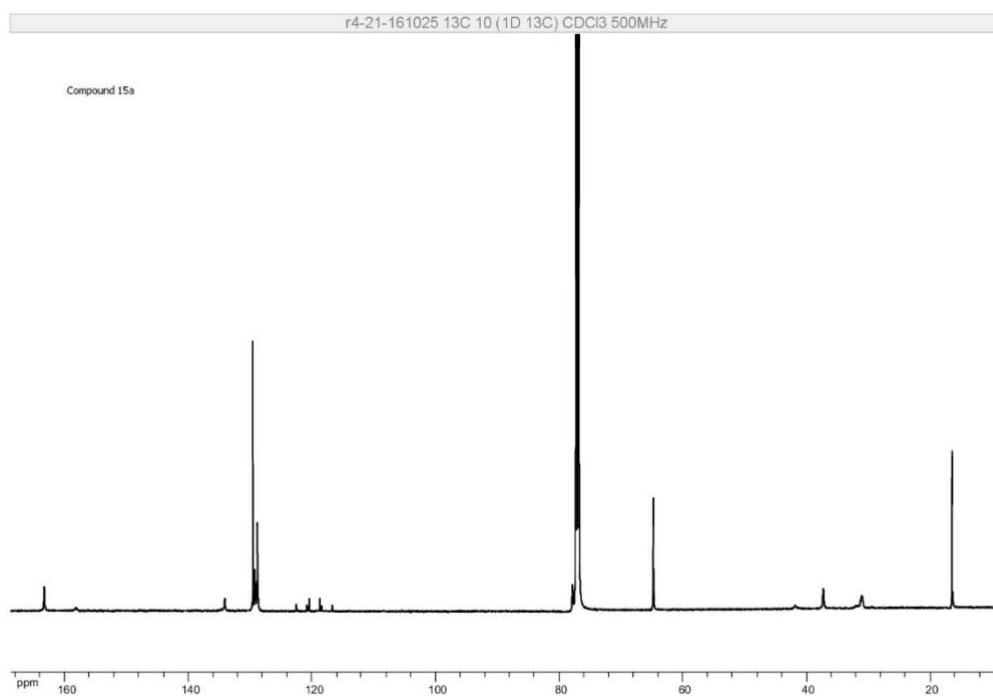

r4-21-161025-31P 10 (1D 31P) CDCl3 300MHz

Compound 15a

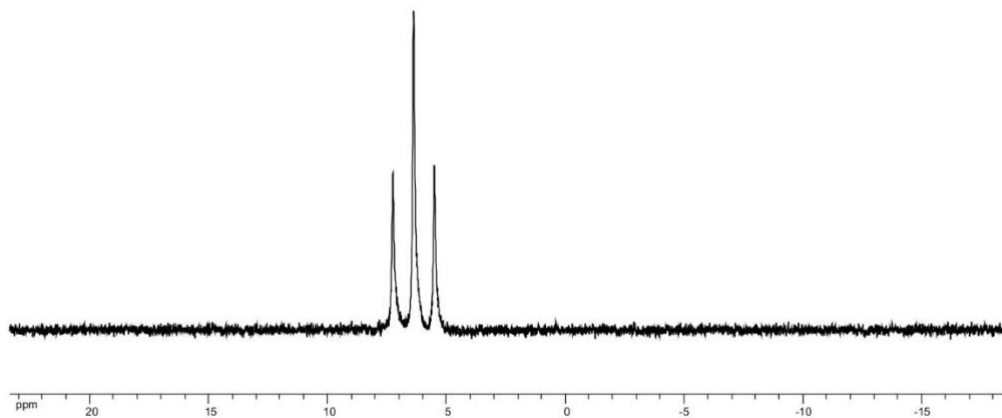

r4-21-161025-19F 10 (1D 19F) CDCl3 300MHz

Compound 15a

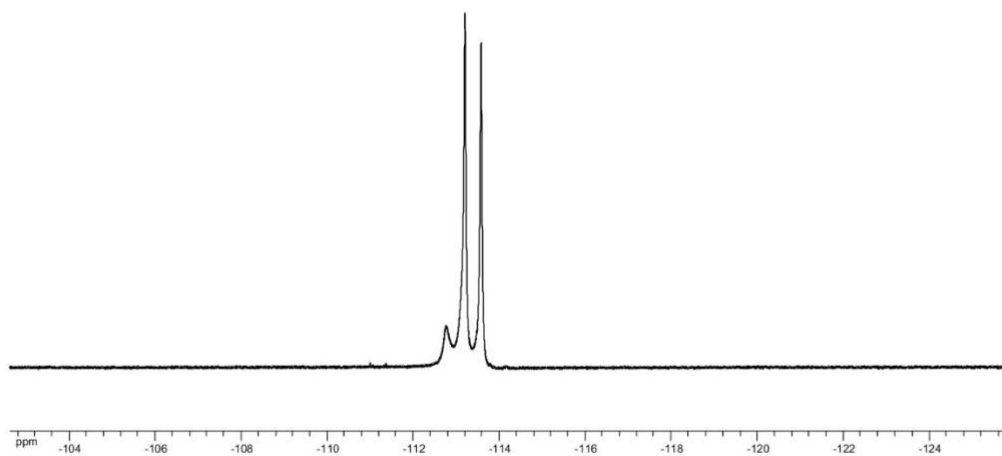



# Compound **15b**

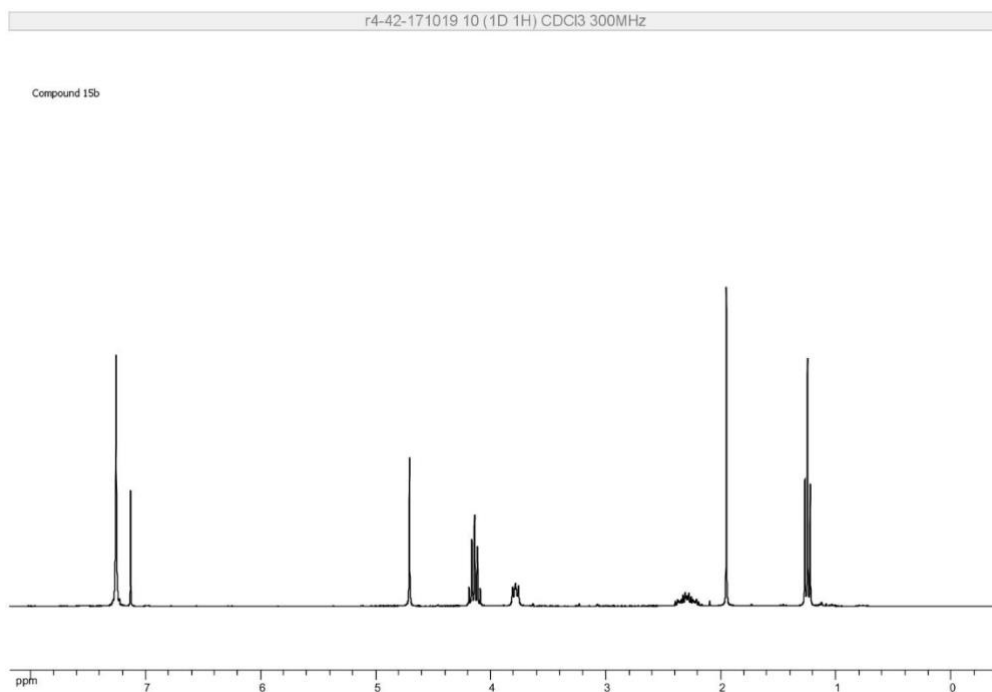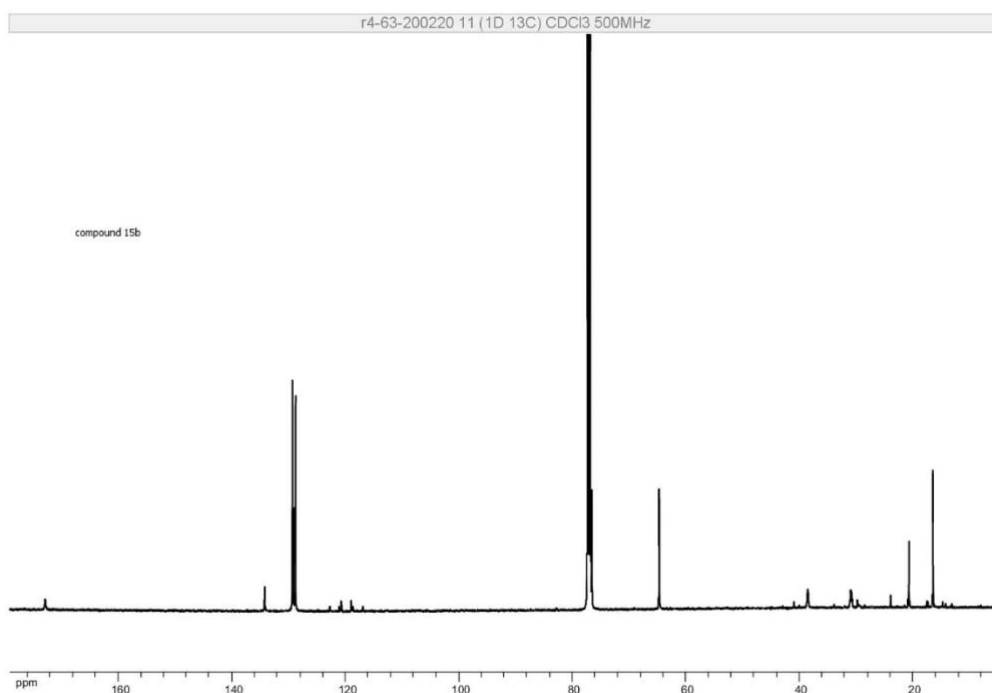

r4-63-200220-31P 10 (1D 31P) CDCl3 300MHz

Compound 15b

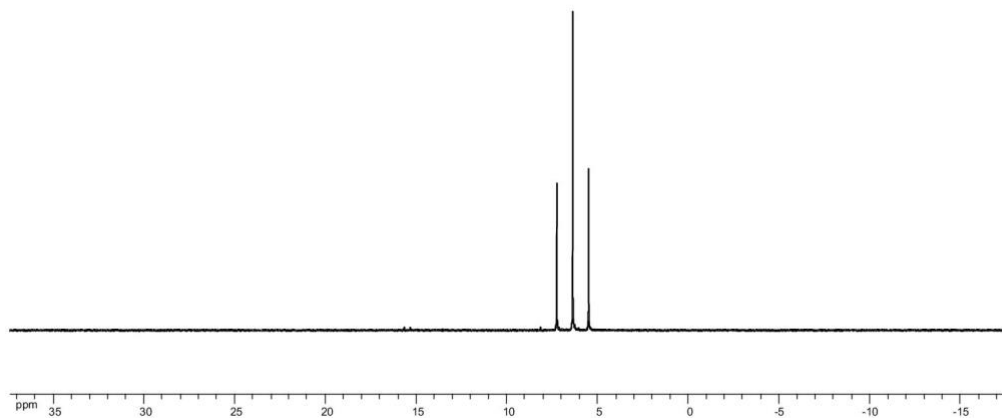

r4-63-200220-19F 10 (1D 19F) CDCl3 300MHz

Compound 15b

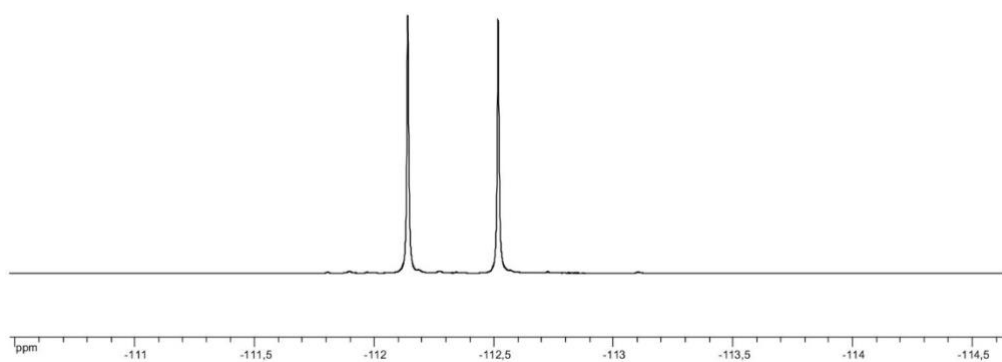

Compound **16a**

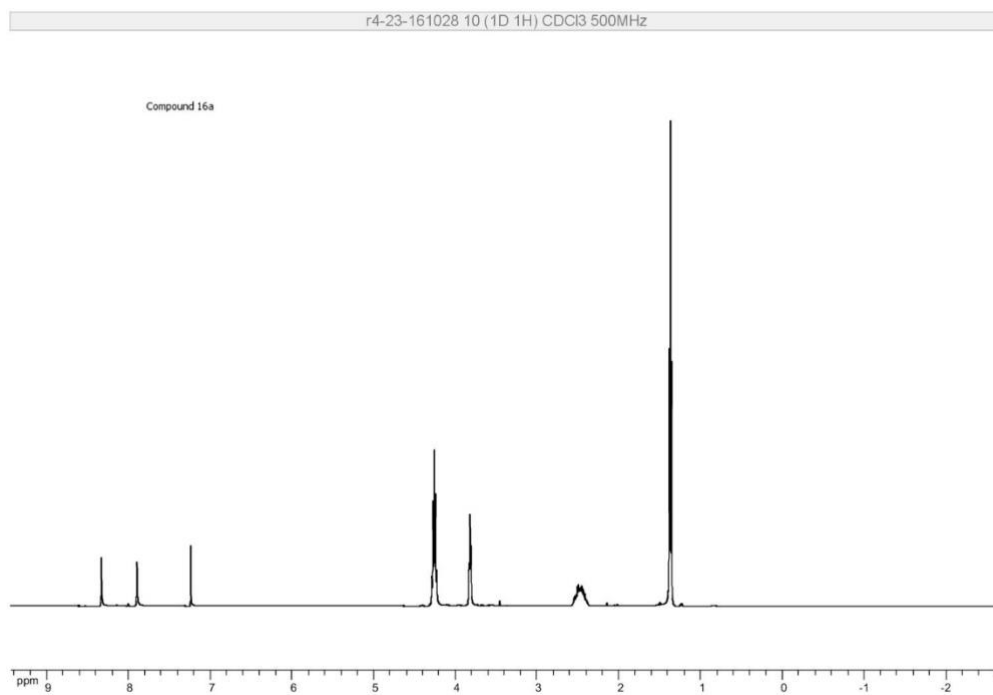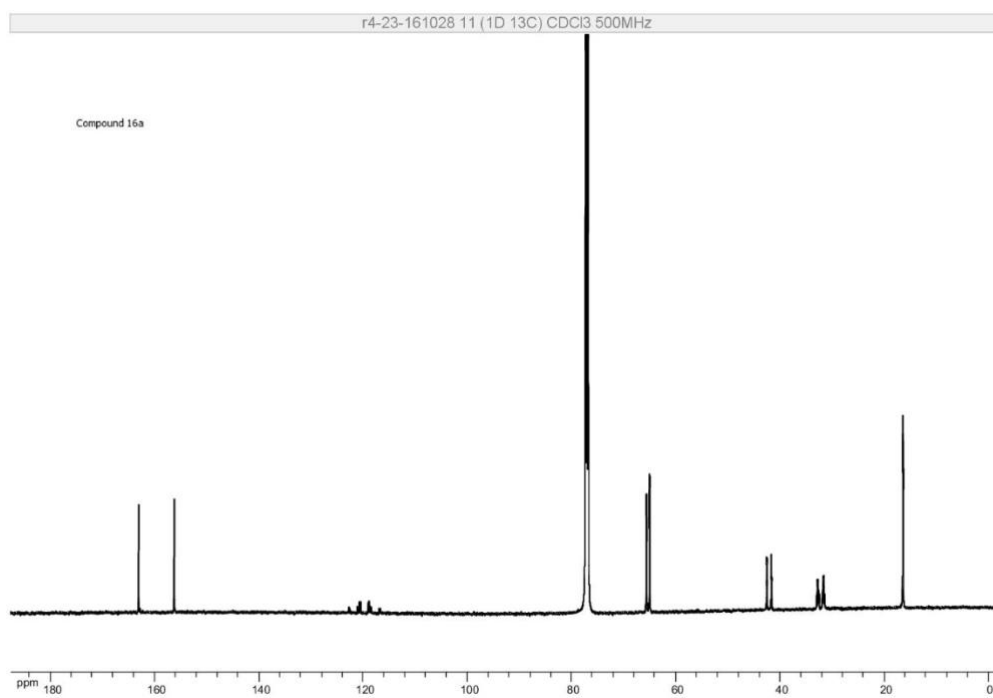

r4-23-161028-31P 10 (1D 31P) CDCl3 300MHz

Compound 16a

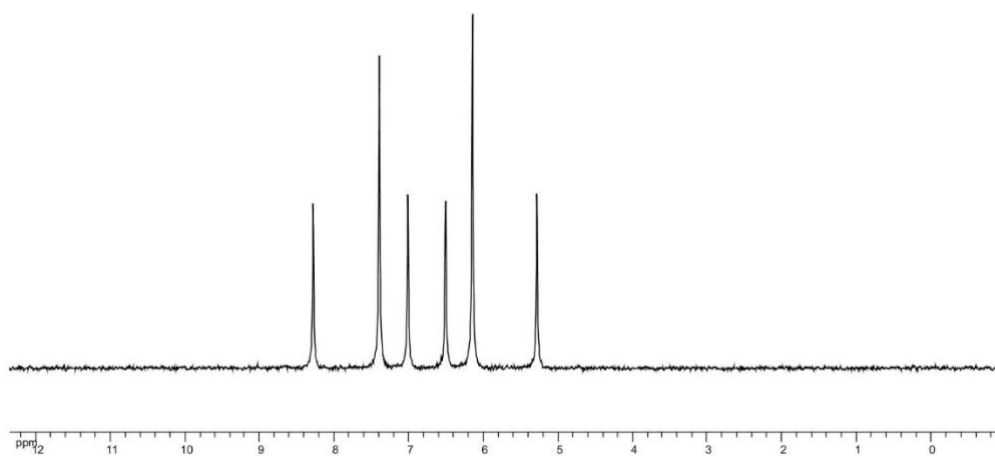

r4-23-161028-19F 10 (1D 19F) CDCl3 300MHz

Compound 16a

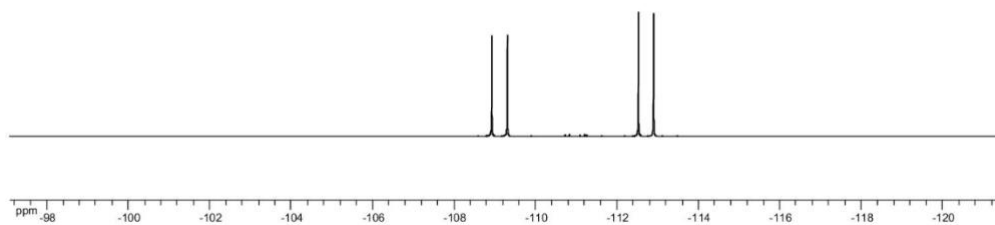

Compound **16b**

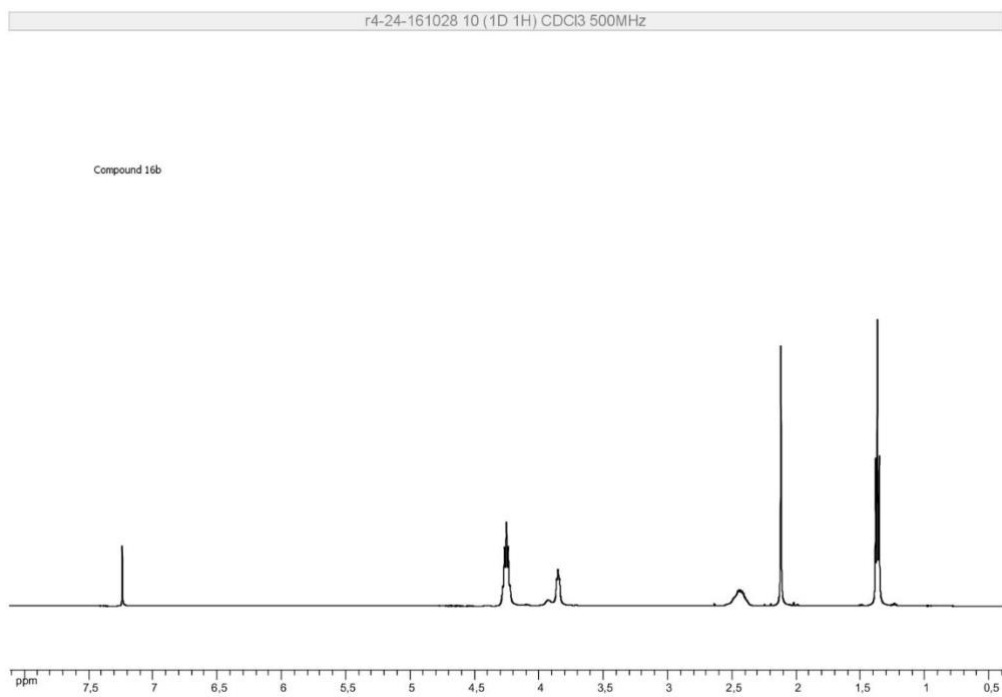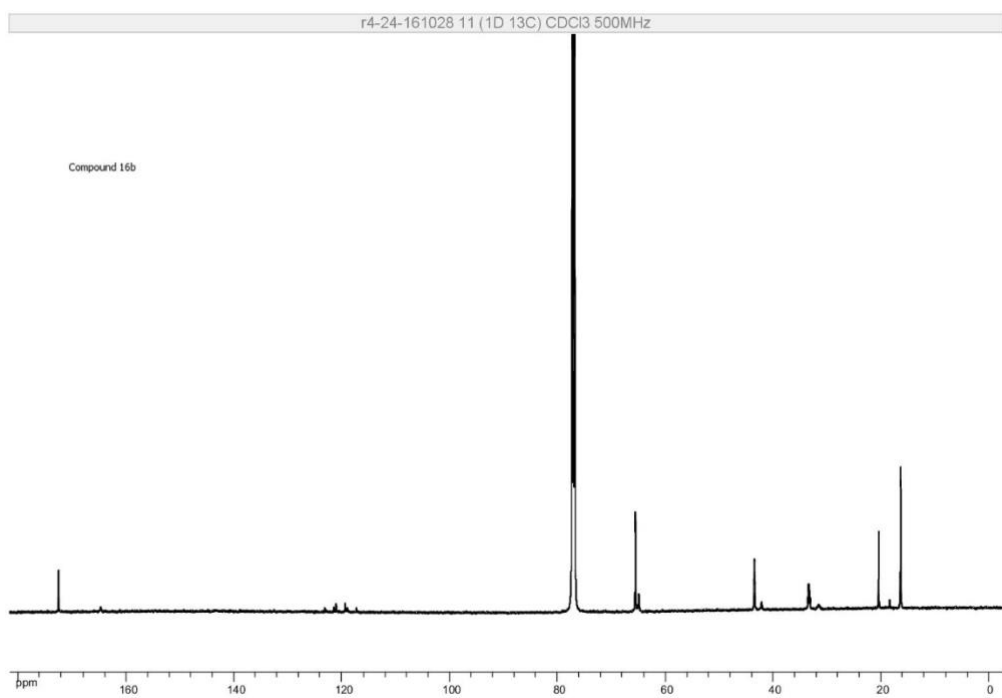

r4-24-161028-31P 10 (1D 31P) CDCl3 300MHz

Compound 16b

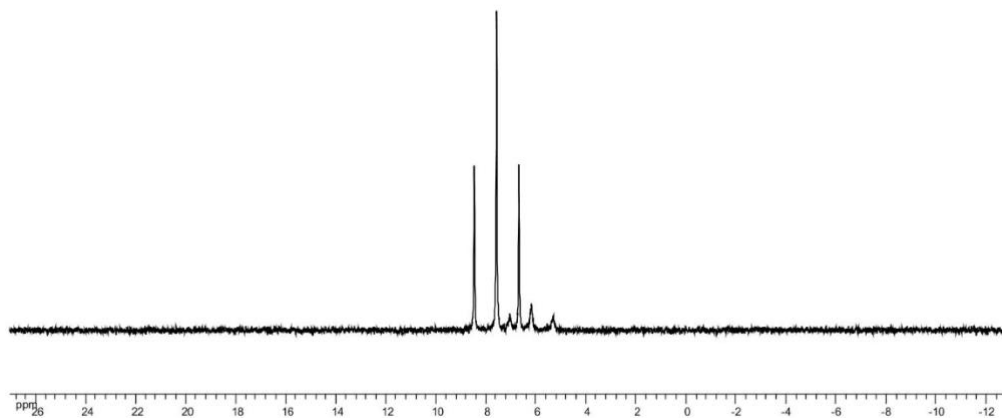

r4-24-161028-19F 10 (1D 19F) CDCl3 300MHz

Compound 16b

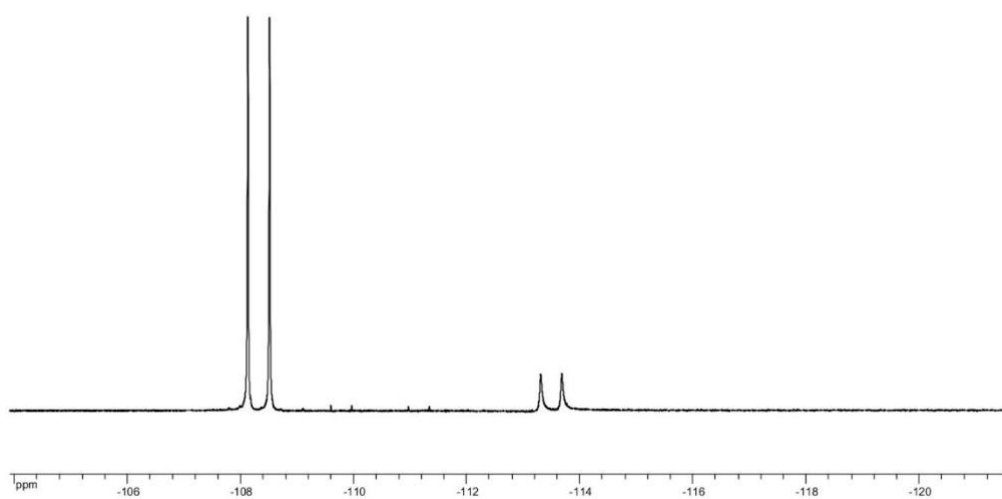

Compound **17**

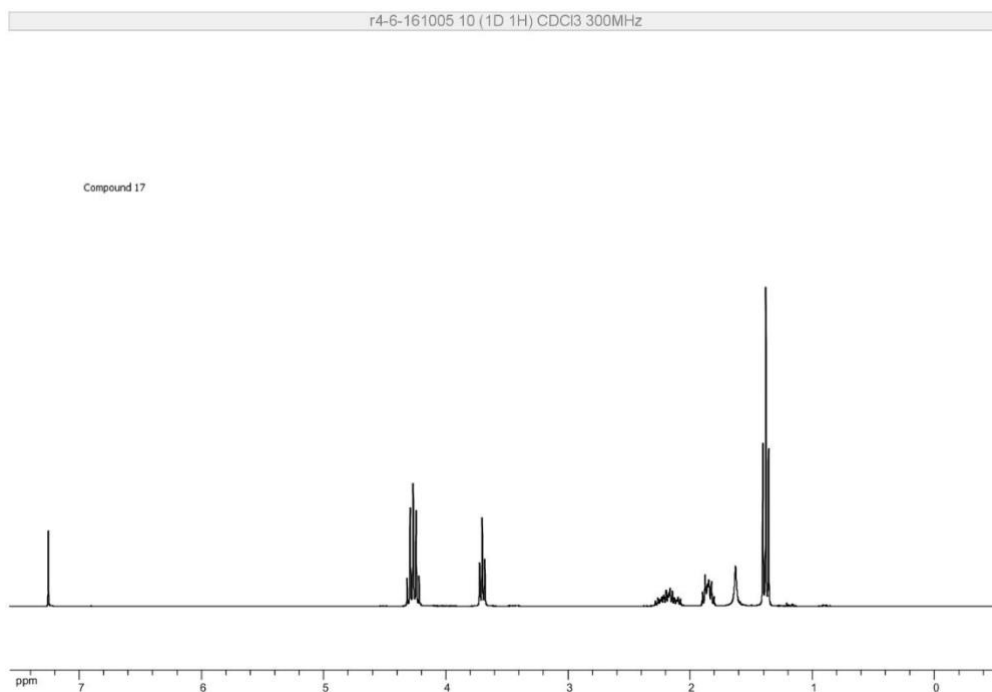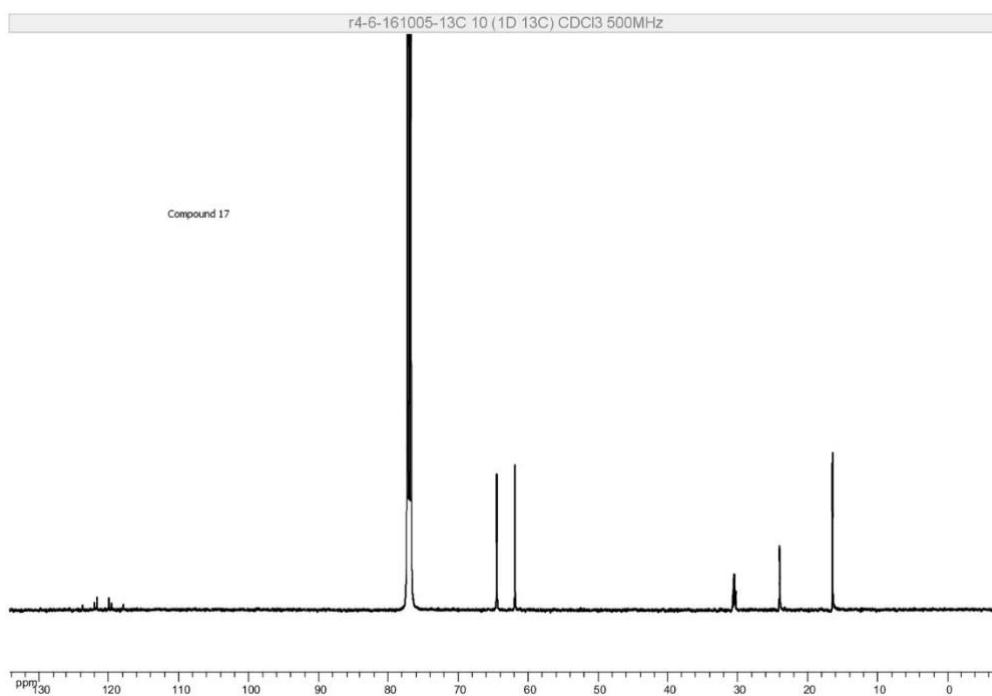

r4-6-161005 11 (1D 31P) CDCl3 300MHz

Compound 17

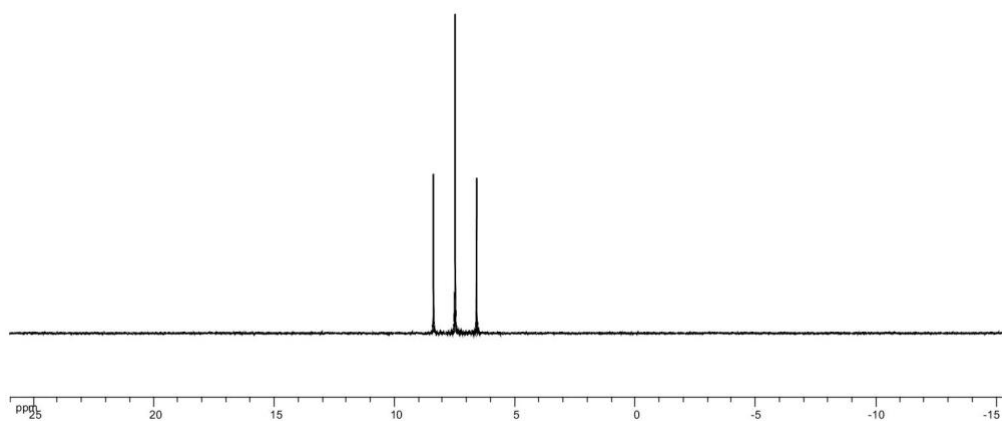

r4-6-161005 12 (1D 19F) CDCl3 300MHz

Compound 17

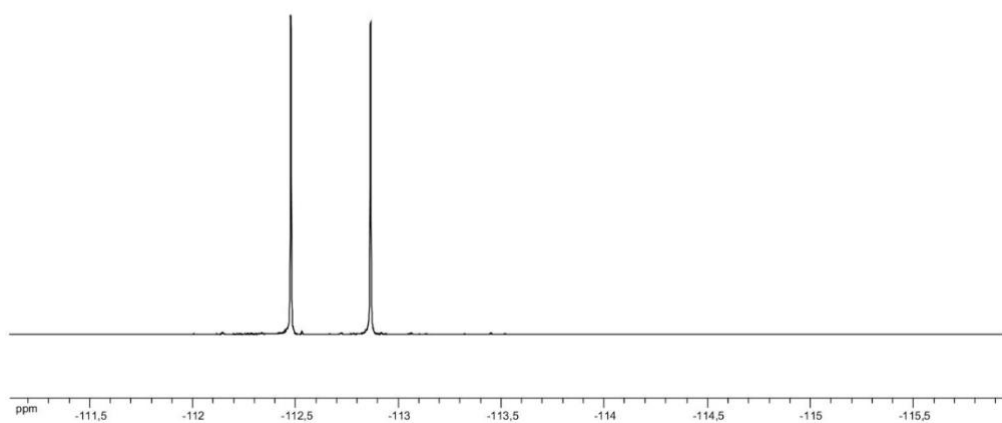



Compound **18**

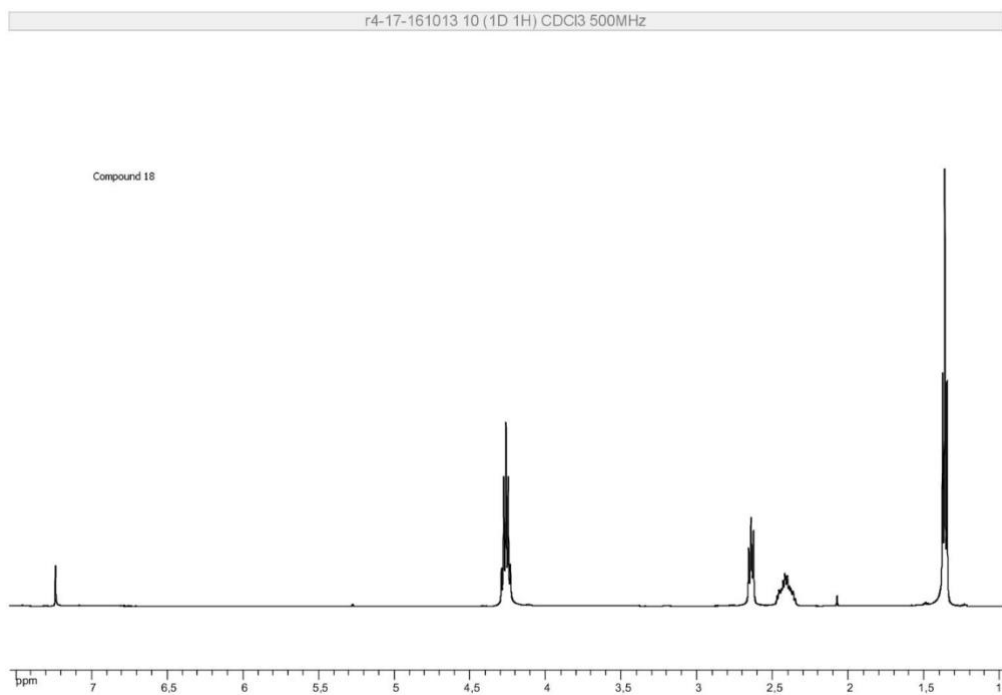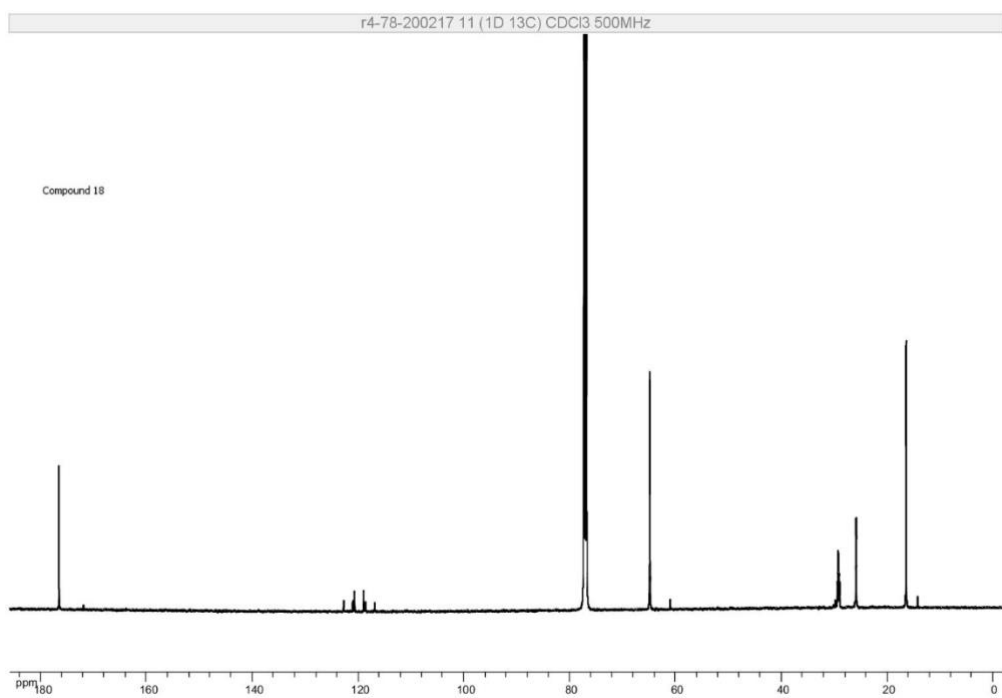

r4-78-200217-31P 10 (1D 31P) CDCl3 300MHz

Compound 18

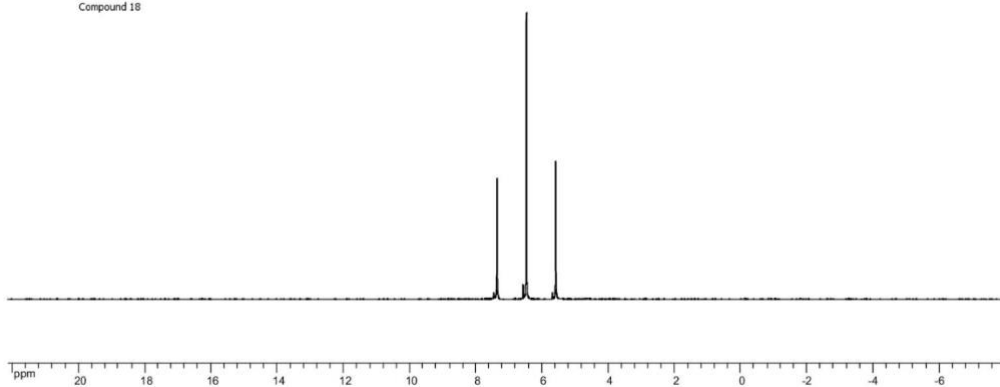

r4-78-200217-19F 10 (1D 19F) CDCl3 300MHz

Compound 18

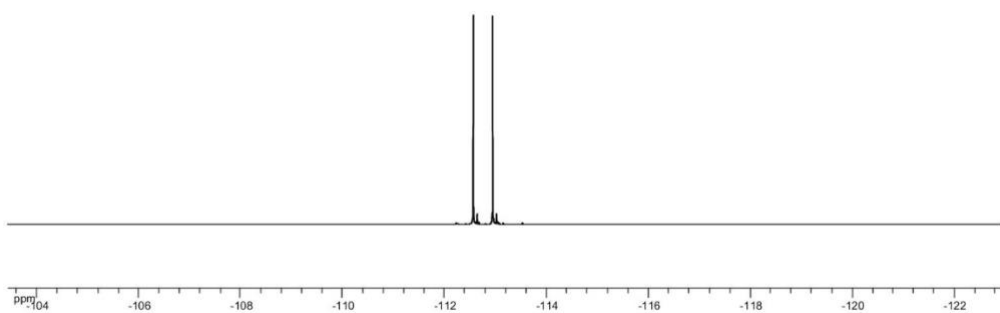

Compound **19a**

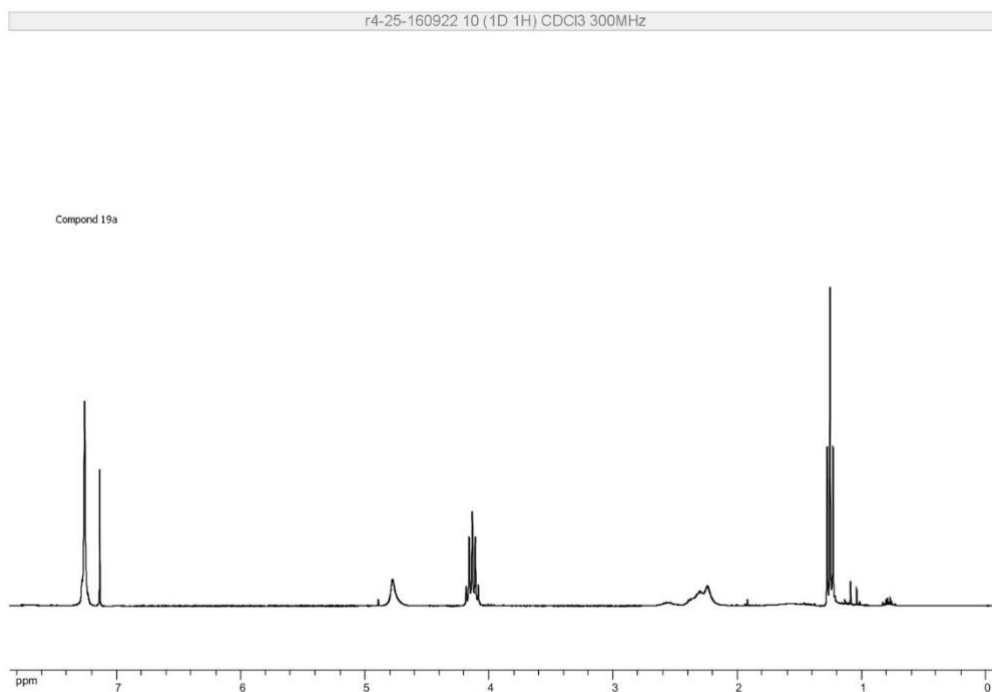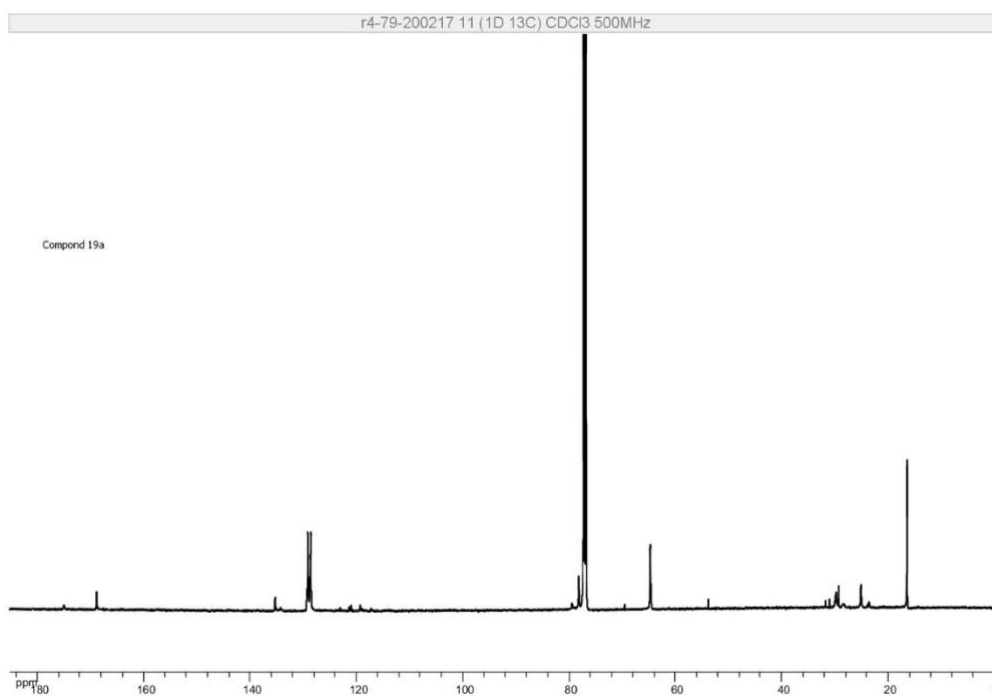

r4-79-200217-31P 10 (1D 31P) CDCl3 300MHz

Compound 19a

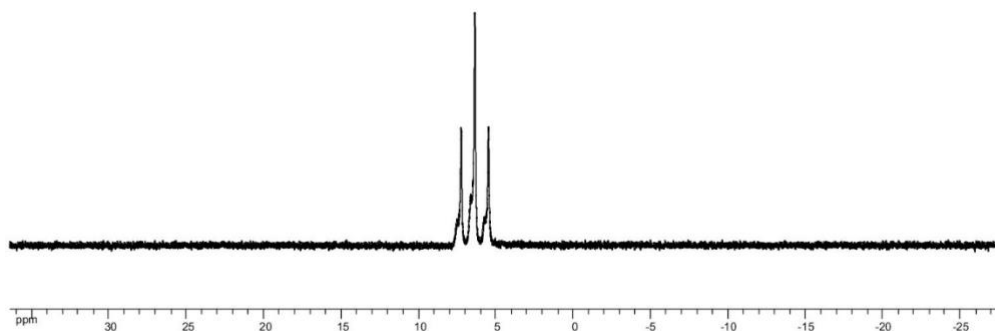

r4-79-200217-31P 11 (1D 19F) CDCl3 300MHz

Compound 19a

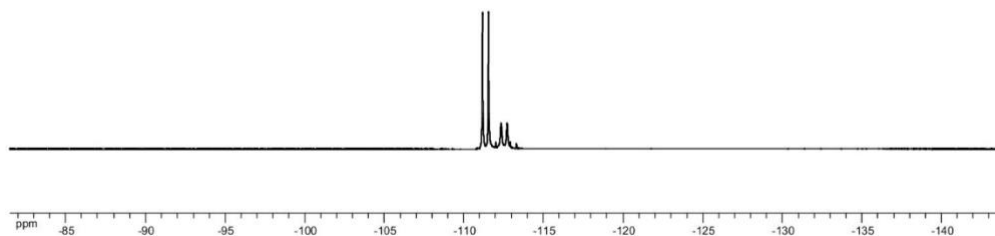

Compound **19b**

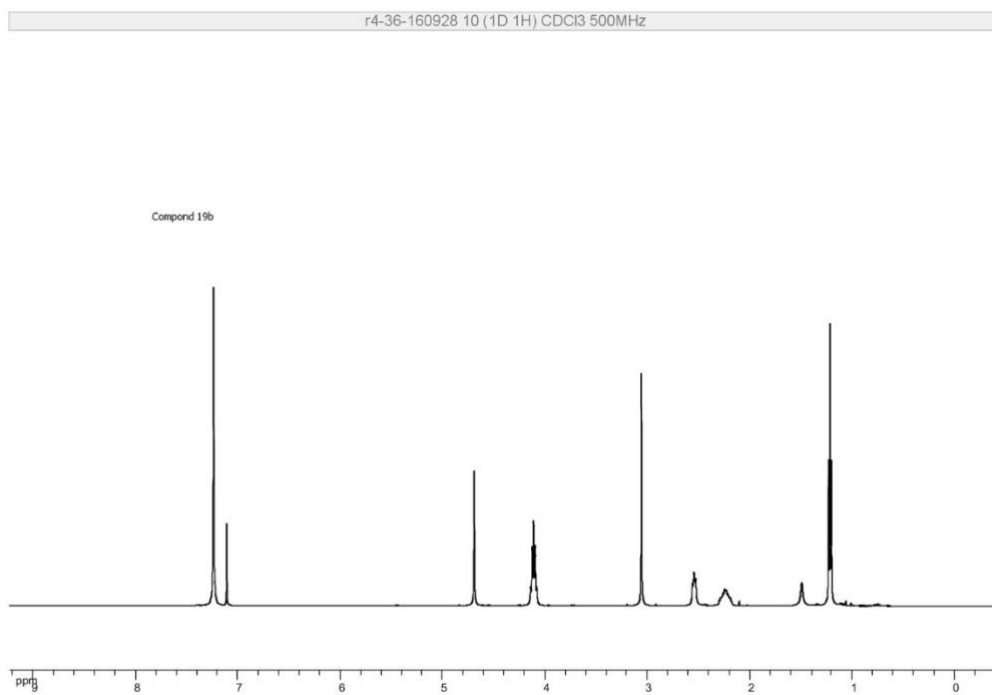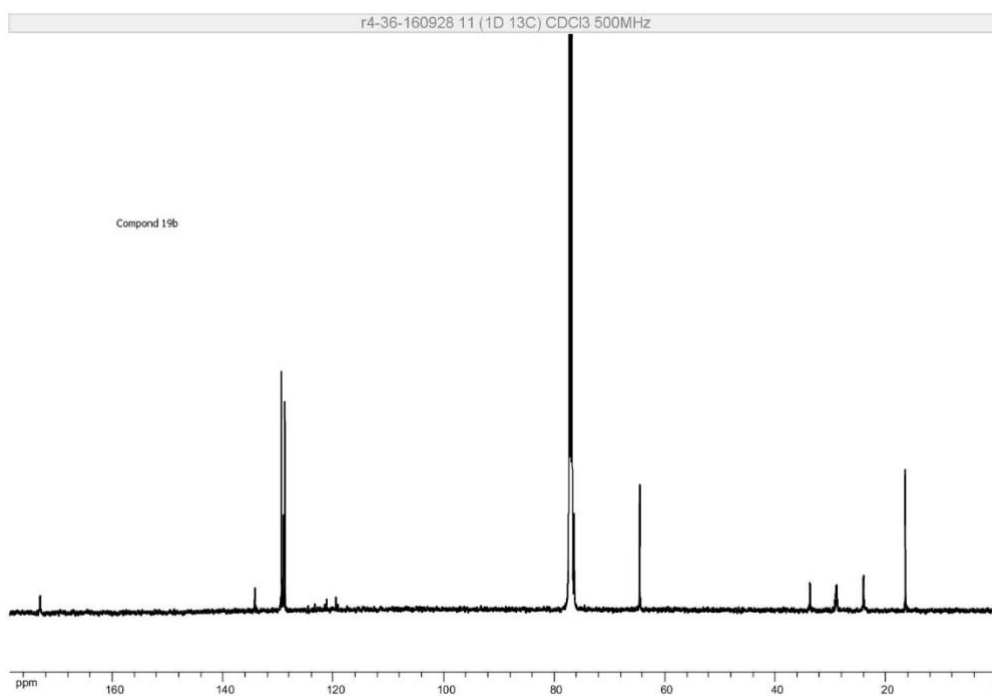

r4-36-160928-31P 10 (1D 31P) CDCl3 300MHz

Compound 19b

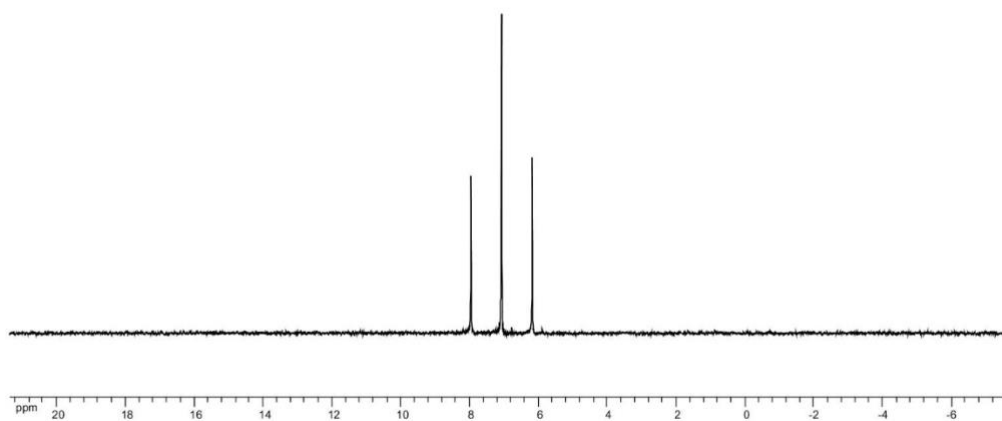

r4-36-160928-19F 10 (1D 19F) CDCl3 300MHz

Compound 19b

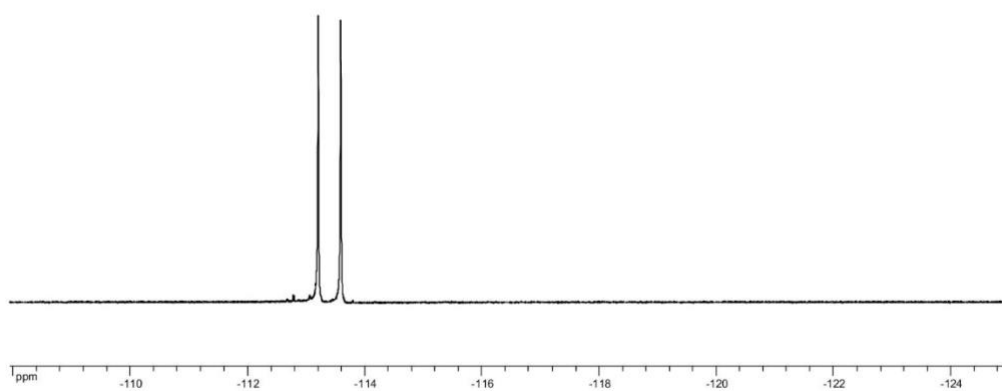

Compound **20a**

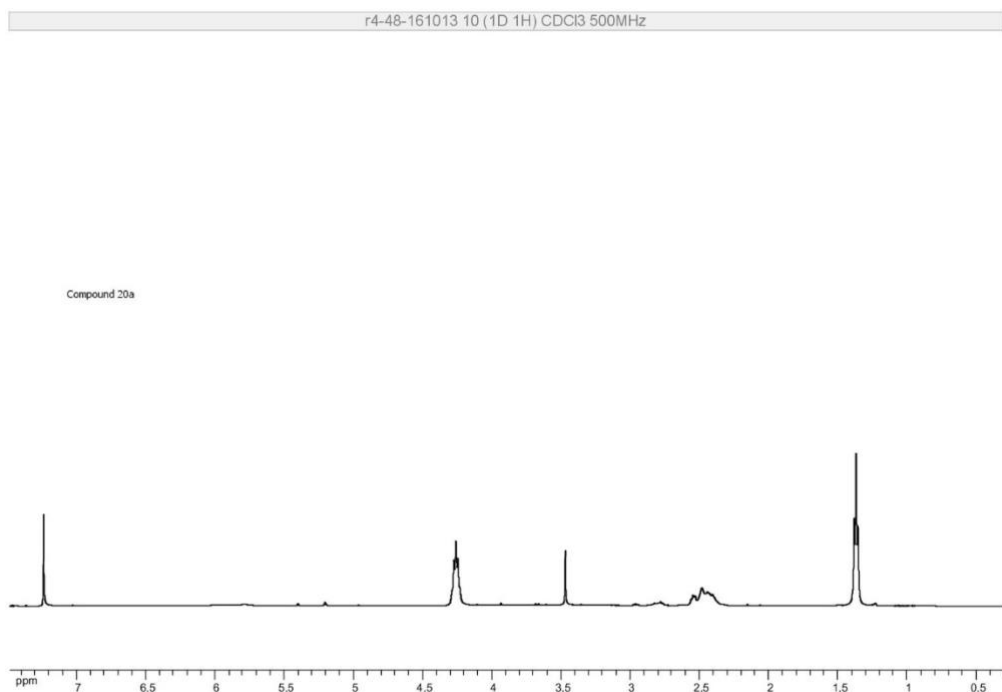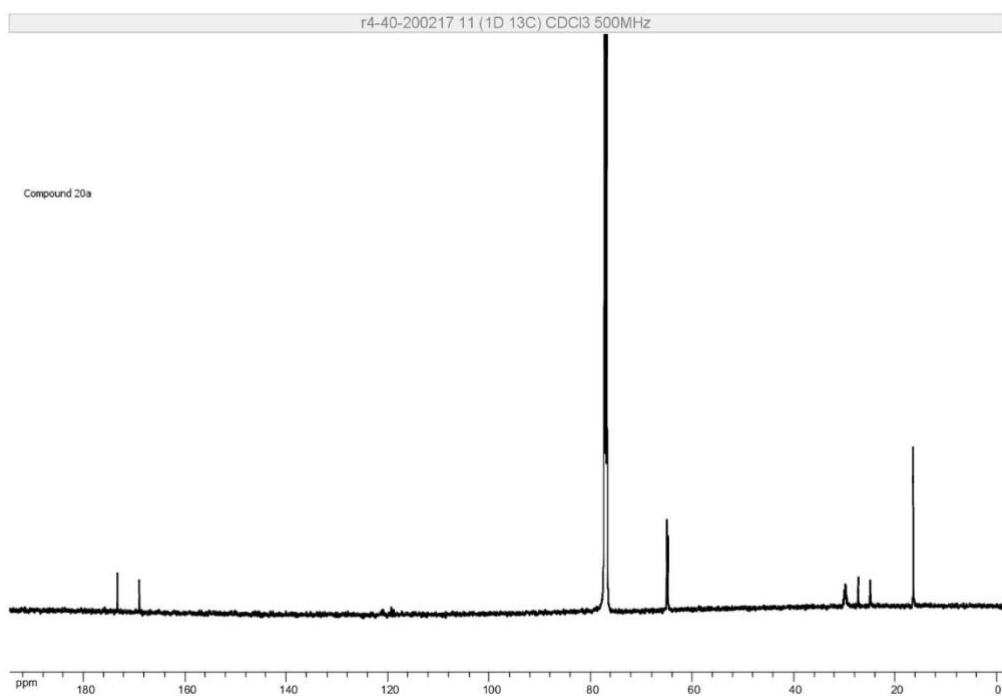

r4-40-200217-31P 10 (1D 31P) CDCl3 300MHz

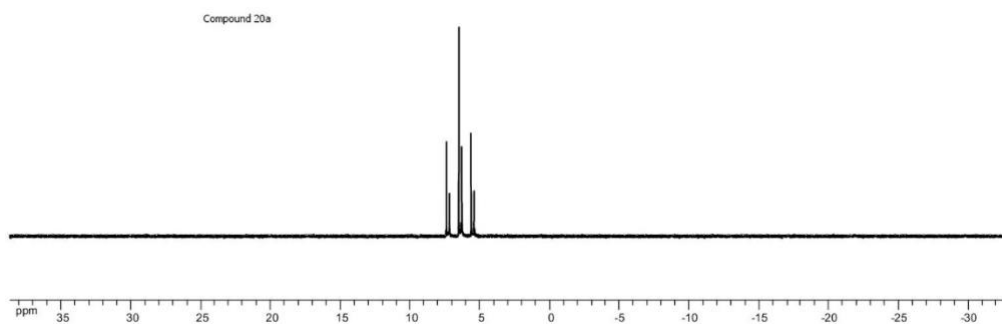

r4-40-200217-19F 10 (1D 19F) CDCl3 300MHz

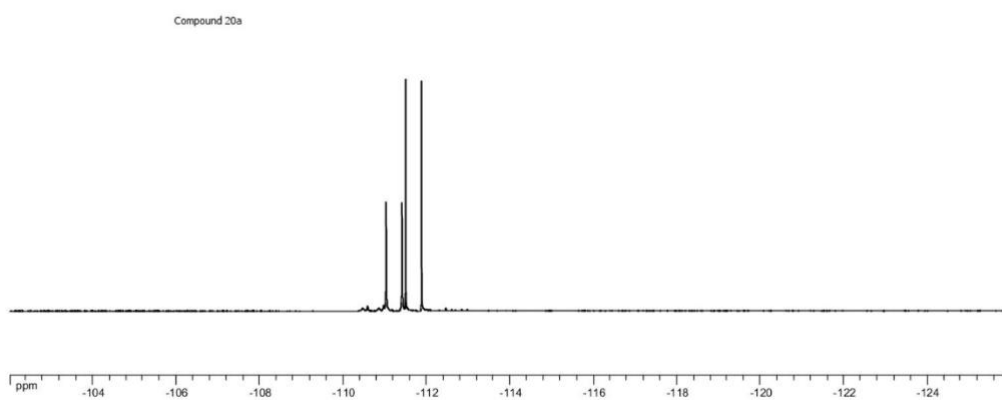



Compound **20b**

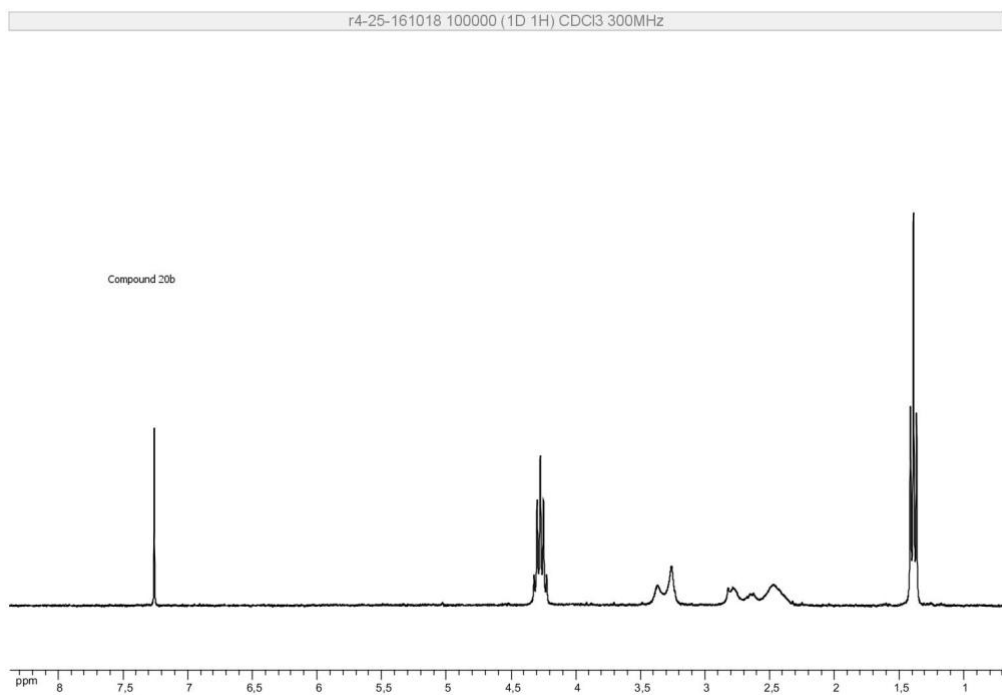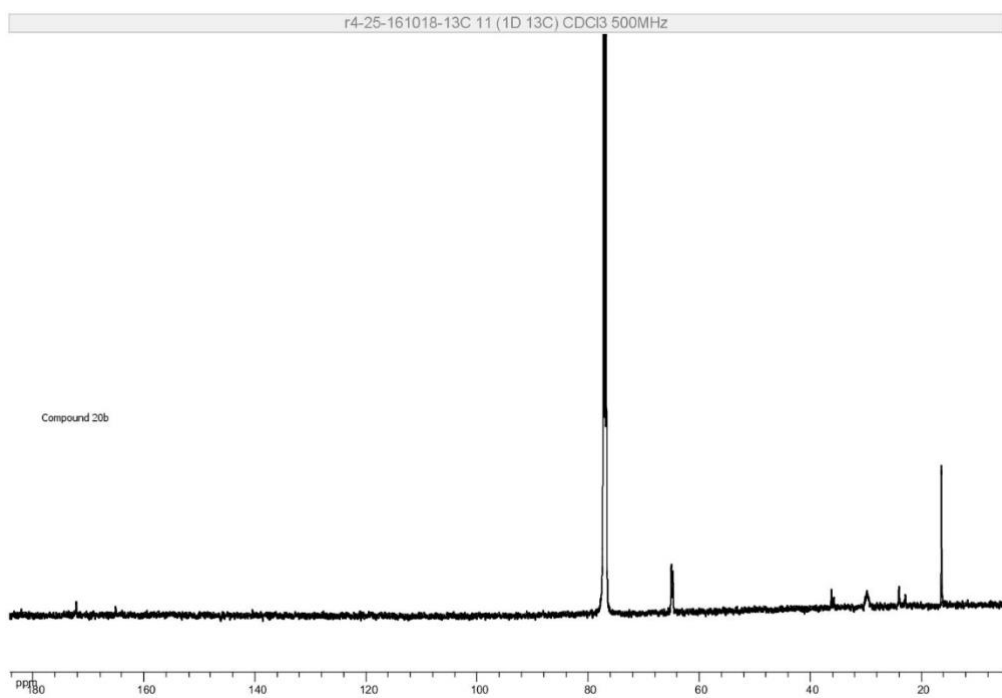

r4-25-161018 11 (1D 31P) CDCl3 300MHz

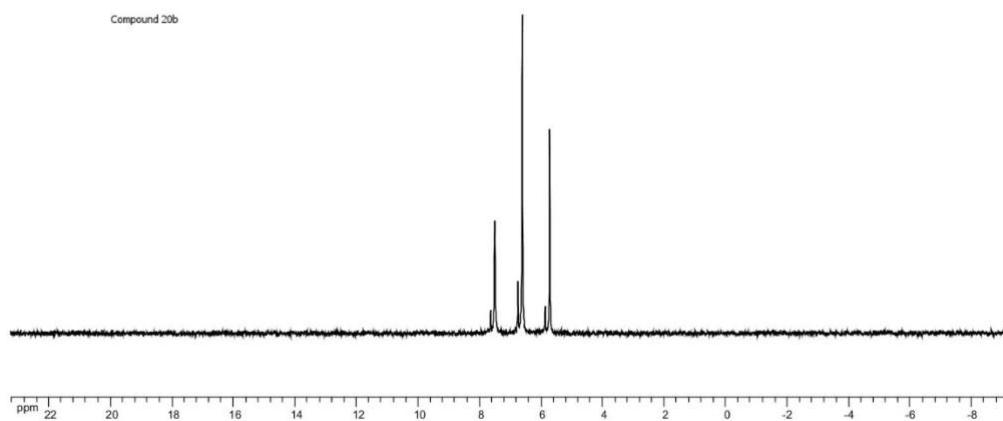

r4-25-161018 12 (1D 19F) CDCl3 300MHz

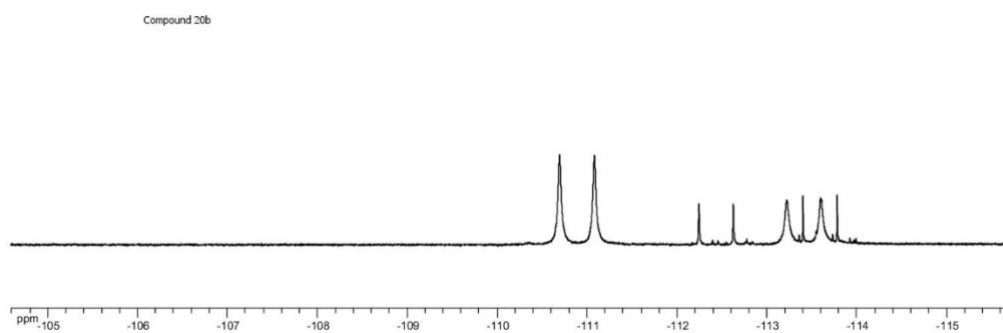

# Compound **9b**

(1,1-difluoro-3-(N-hydroxyacetamido)propyl)phosphonic acid (**9b**)

$^1\text{H}$  NMR, 400 MHz, MeOD

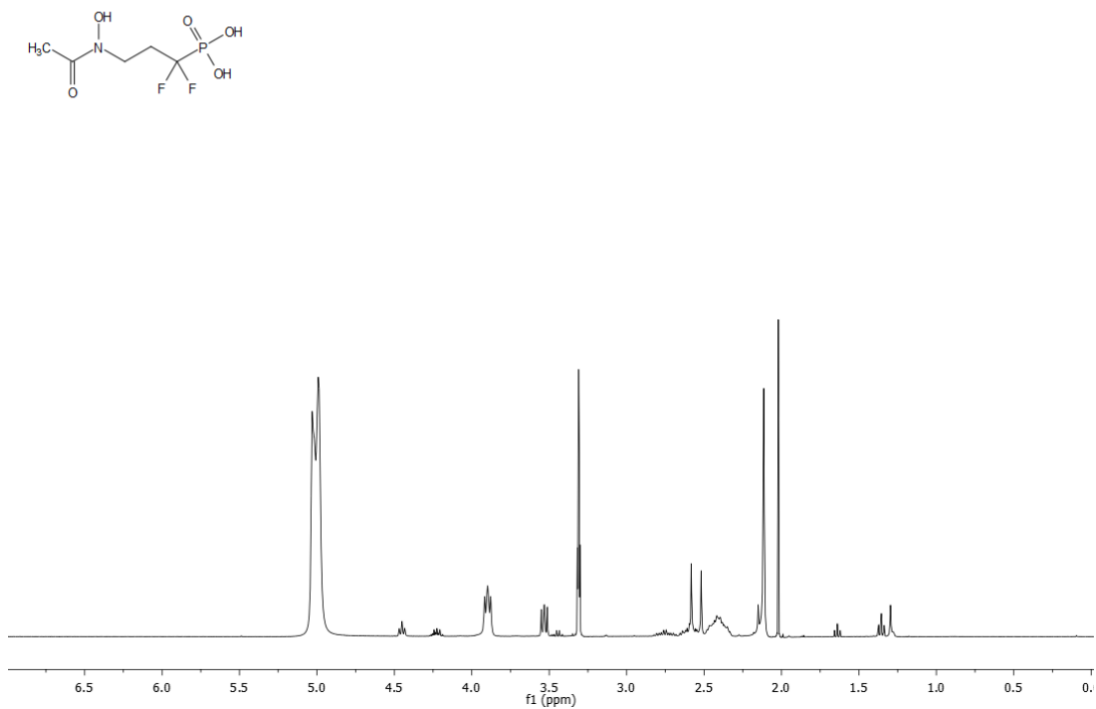

(1,1-difluoro-3-(N-hydroxyacetamido)propyl)phosphonic acid (**9b**)

$^{13}\text{C}$  NMR, 500 MHz, MeOD

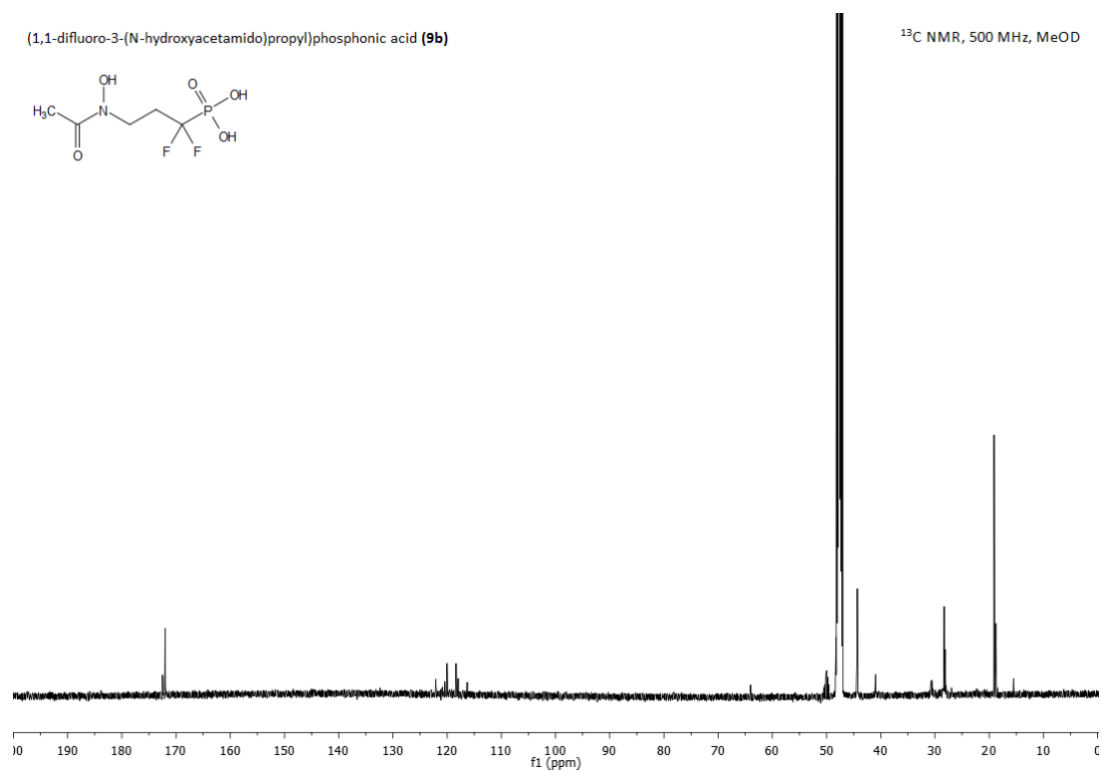

(1,1-difluoro-3-(N-hydroxyacetamido)propyl)phosphonic acid (**9b**)

$^{19}\text{F}$  NMR, 282 MHz, MeOD

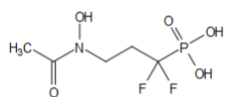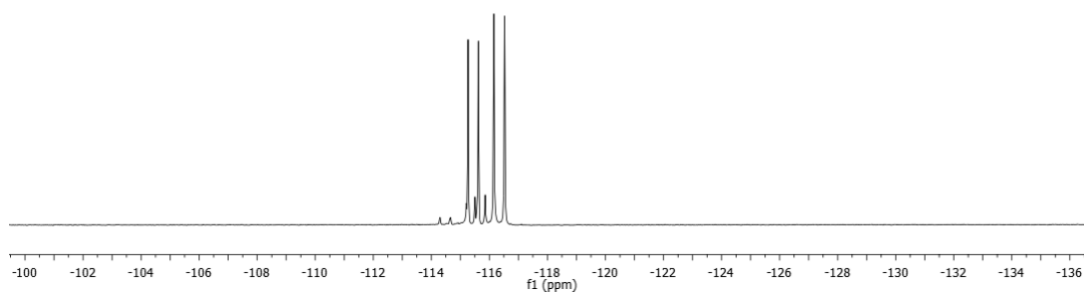

(1,1-difluoro-3-(N-hydroxyacetamido)propyl)phosphonic acid (**9b**)

$^{31}\text{P}$  NMR, 162 MHz, MeOD

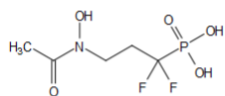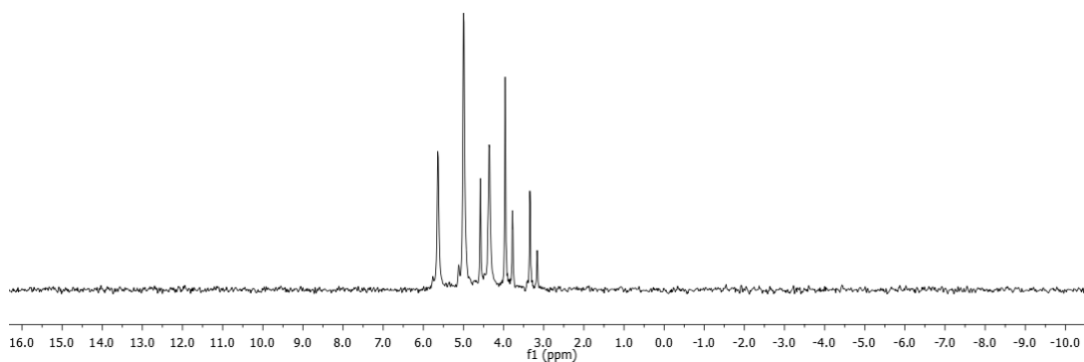

# Compound **10a**

(1,1-difluoro-4-(hydroxyamino)-4-oxobutyl)phosphonic acid (**10a**)

$^1\text{H}$  NMR, 400 MHz, MeOD

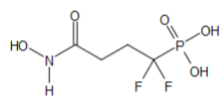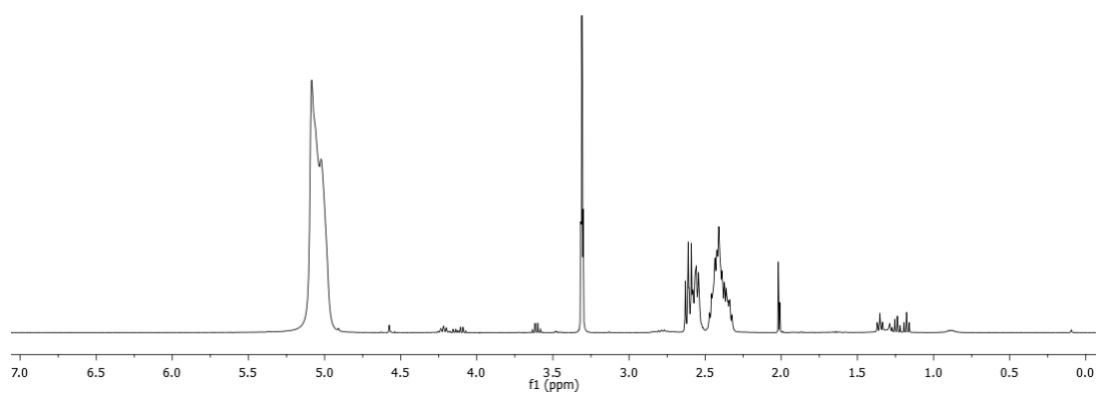

(1,1-difluoro-4-(hydroxyamino)-4-oxobutyl)phosphonic acid (**10a**)

$^{13}\text{C}$  NMR, 500 MHz, MeOD

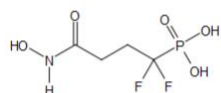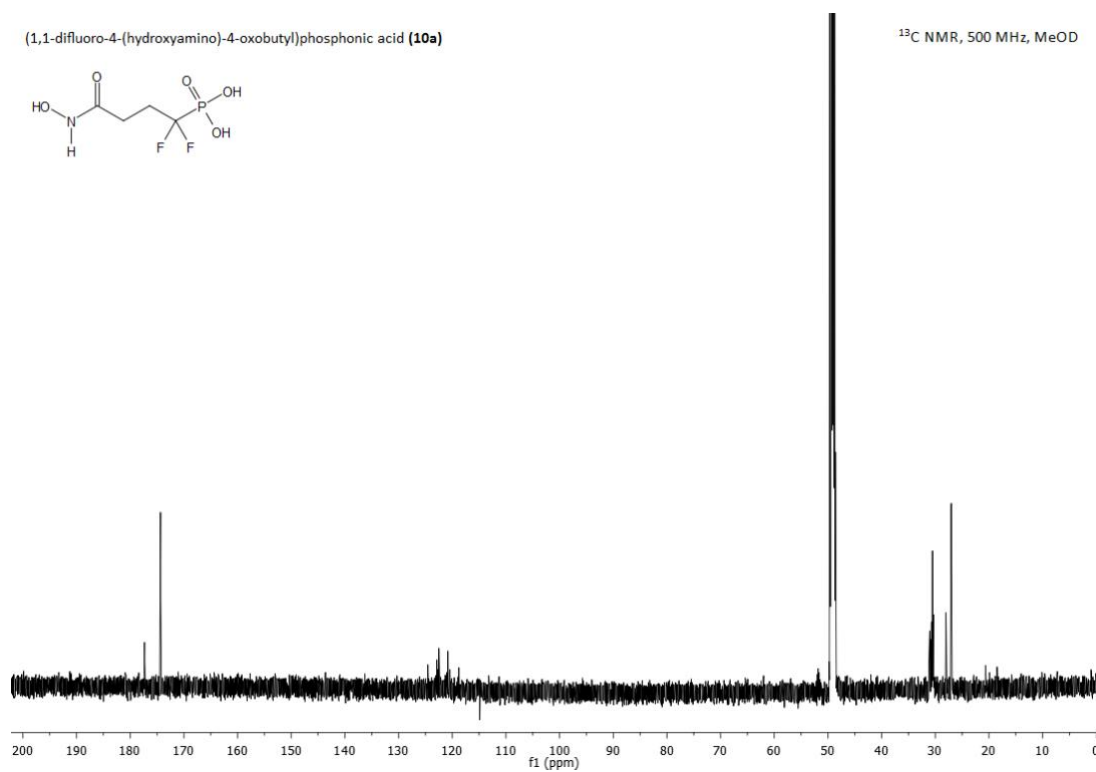

(1,1-difluoro-4-(hydroxyamino)-4-oxobutyl)phosphonic acid (**10a**)

$^{19}\text{F}$  NMR, 282 MHz, MeOD

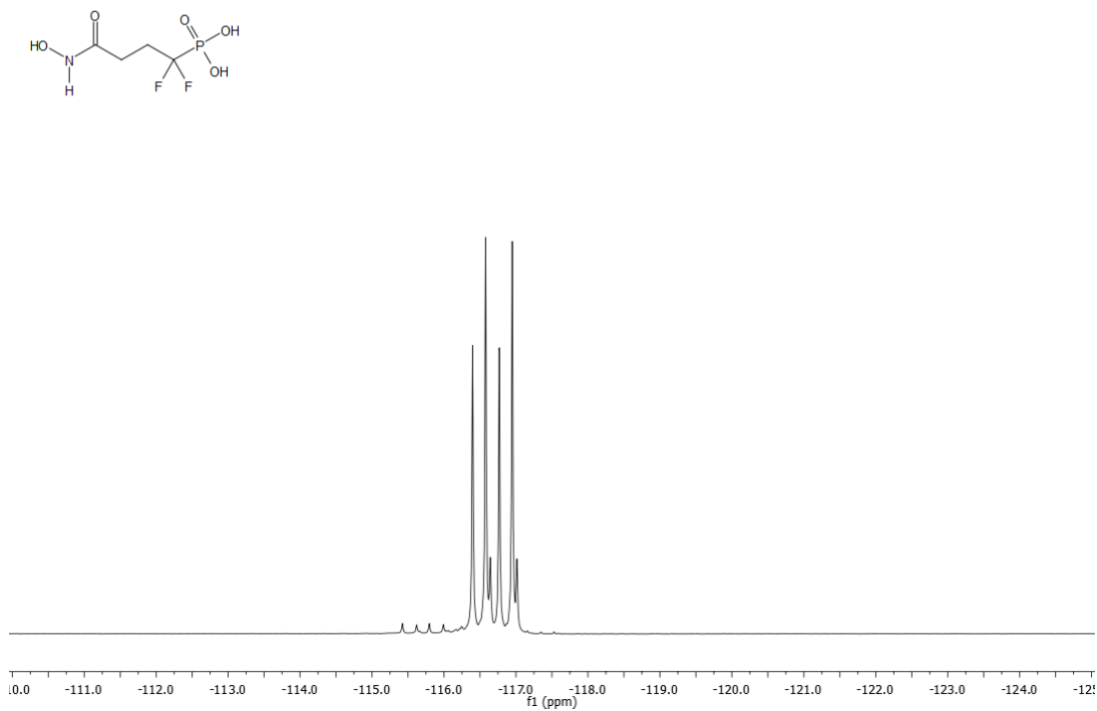

(1,1-difluoro-4-(hydroxyamino)-4-oxobutyl)phosphonic acid (**10a**)

$^{31}\text{P}$  NMR, 162 MHz, MeOD

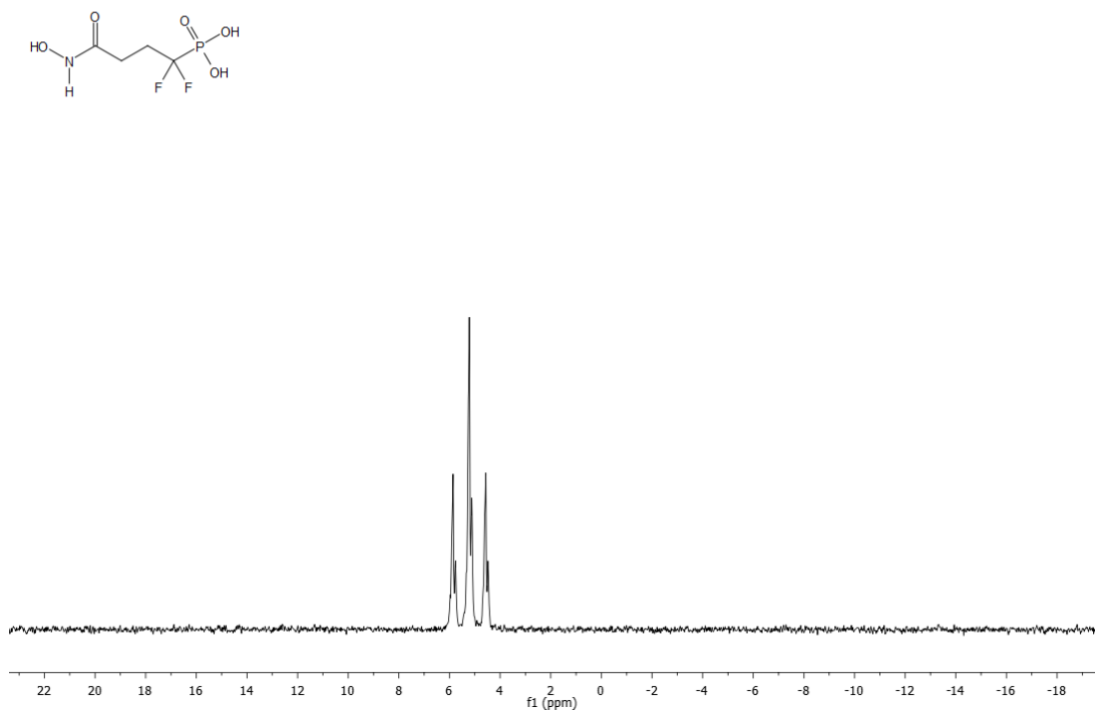

## Compound **10b**

(1,1-difluoro-4-(hydroxy(methyl)amino)-4-oxobutyl)phosphonic acid (**10b**)

$^1\text{H}$  NMR, 400 MHz, MeOD

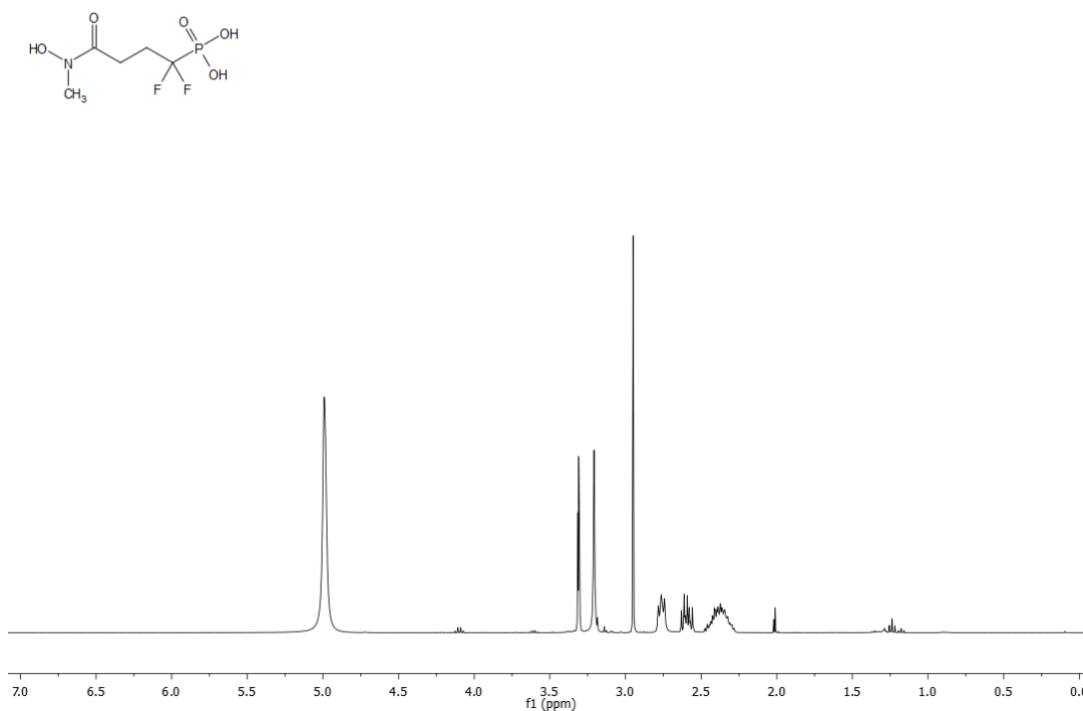

(1,1-difluoro-4-(hydroxy(methyl)amino)-4-oxobutyl)phosphonic acid (**10b**)

$^{13}\text{C}$  NMR, 500 MHz, MeOD

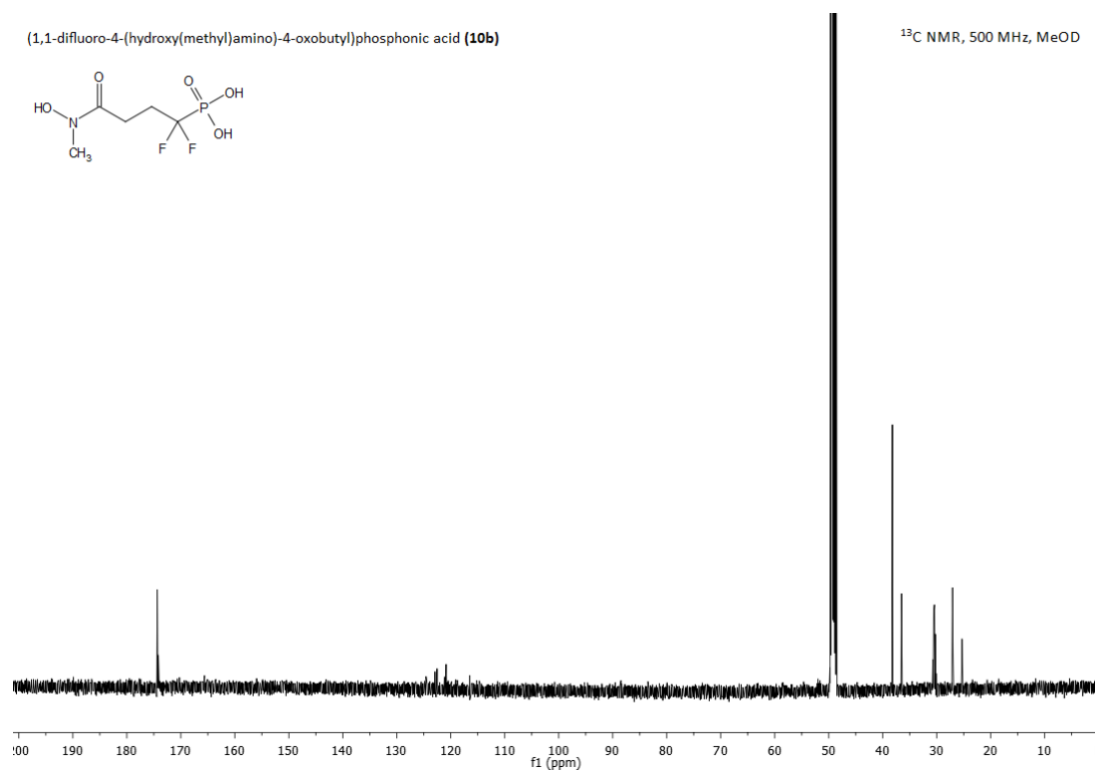

(1,1-difluoro-4-(hydroxy(methyl)amino)-4-oxobutyl)phosphonic acid (**10b**)

$^{19}\text{F}$  NMR, 282 MHz, MeOD

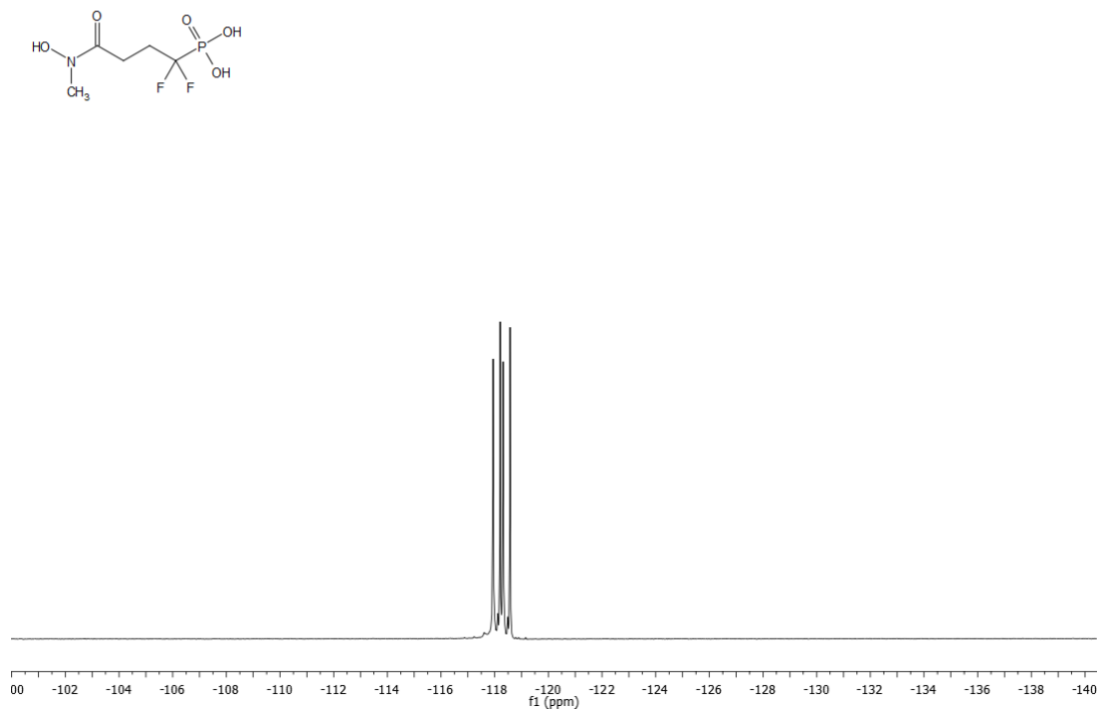

(1,1-difluoro-4-(hydroxy(methyl)amino)-4-oxobutyl)phosphonic acid (**10b**)

$^{31}\text{P}$  NMR, 162 MHz, MeOD

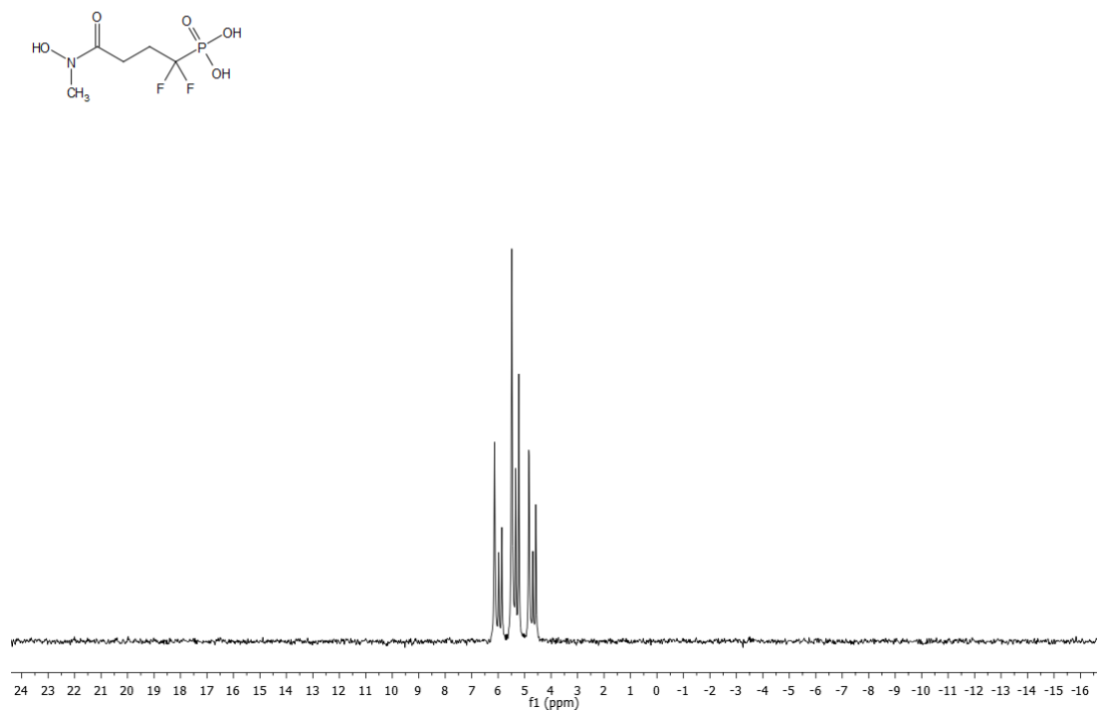

Supplement: s1 [file s1]
